1 Fluorosurfactants in groundwater increase the incidence of chronic health conditions among California  
2 Medicare beneficiaries.

3 Lucas M. Neas<sup>a</sup>, William Steinhardt<sup>b</sup>, K. Lloyd Hill<sup>b</sup>, Riley Short<sup>b</sup>, Elaine Hubal, Brian J Reich<sup>c</sup>, Shu Yang<sup>c</sup>,  
4 Alvin Sheng<sup>c</sup>, Ana G. Rappold<sup>a</sup>

5

6 Affiliations

7 a) Center for Public Health and Environmental Assessment, U.S. Environmental Protection Agency,  
8 Chapel Hill, North Carolina, USA.

9 b) Oak Ridge Associated Universities, Oak Ridge, Tennessee, USA.

10 c) Department of Statistics, North Carolina State University, Raleigh, North Carolina, USA.

11 Corresponding author: Ana Rappold, U.S. EPA Human Studies Facility, 104 Mason Farm Rd., Chapel Hill,  
12 NC 27514, USA. E-mail address: [rappold.ana@epa.gov](mailto:rappold.ana@epa.gov) (A.G. Rappold).

13 Declaration of competing financial interests: This work was funded with internal funds from the U.S.  
14 Environmental Protection Agency (EPA). The authors declare they have no actual or potential  
15 competing financial interests.

16 Acknowledgments: Although this work has been reviewed for publication by the U.S. Environmental  
17 Protection Agency, it does not necessarily reflect the views and policies of the Agency. Reference herein  
18 to any specific commercial products, process, or service by trade name, trademark, manufacturer, or  
19 otherwise, does not necessarily constitute or imply its endorsement, recommendation, or favoring by  
20 the United States Government.

21 Data sharing: All data used in this manuscript are publicly available from the appropriate data sources.

22 Key words: per-and polyfluorinated compounds (PFAS), Medicare, groundwater, hypertension,  
23 cataracts, chronic kidney disease, chronic obstructive pulmonary disease.

24 **Abstract**

25 Background: Per- and polyfluoroalkyl substances (PFAS) are persistent organic pollutants with emerging  
26 environmental and regulatory concerns.

27 Objectives: This study aimed to estimate the burden of PFAS exposures through ground water on the  
28 incidence of chronic health conditions among Medicare beneficiaries aged 65 years and older.

29 Methods: We estimated PFAS groundwater concentrations for every ZIP code tabulated area (ZCTA) in  
30 California counties where 25 percent or more of the population's drinking water was derived from  
31 groundwater. We calculated the annual incidence of non-cancer chronic health conditions among  
32 1,696,247 Medicare beneficiaries aged 65 and older by residential ZCTA over the seven-year study  
33 period (2011-2017). A Poisson regression model was used to estimate associations between PFAS  
34 groundwater concentration and chronic condition incidence with an offset for the number of  
35 beneficiary-years at risk and adjusting for bias due to non-random sampling of wells, use of groundwater  
36 for drinking water, demographic characteristics, and lung cancer incidence as a control for smoking.

37 Results: Results suggest an association between a 10 ng/L increment in PFAS contaminated  
38 groundwater and chronic health conditions including hypertension (+1.15%, 95% confidence interval (CI)  
39 1.01, 1.30), chronic kidney disease (+0.83%, 95% CI 0.68, 0.99) and cataracts (+1.50%, 95% CI 1.35, 1.66).

40 Discussion: This small increment in the incidence rate would produce an additional 1,700 new cases of  
41 hypertension each year in the study population.

| <b>Abbreviation</b> | <b>Full Phrase</b>                                         |
|---------------------|------------------------------------------------------------|
| ZIP-code            | Zone Improvement Plan Code                                 |
| ZCTA                | Zip Code Tabulation Area                                   |
| EPA                 | Environmental Protection Agency                            |
| GAMA                | Groundwater Ambient Monitoring and Assessment              |
| ACS-5               | American Community Survey                                  |
| CES                 | CalEnviroScreen                                            |
| ECHO                | Enforcement and Compliance History Online                  |
| NLCD                | National Land Cover Dataset                                |
| POLARIS             | Probabilistic Remapping of Soil Survey Geographic Database |
| PWSID               | Public Water System Information Dataset                    |
| COPD                | Chronic Obstructive Pulmonary Disease                      |
| GW                  | Groundwater                                                |
| PS                  | Propensity Score                                           |
| glm                 | Generalized Linear Model                                   |
| XGBoost             | Extreme Gradient Boosting                                  |
| IQR                 | Inner quartile range                                       |
| ng/L                | nanograms per liter                                        |
| km                  | kilometer                                                  |
| m                   | meter                                                      |
| pH                  | Potential of Hydrogen                                      |
| DAG                 | Directed Acyclic Graph                                     |
|                     |                                                            |
| PFAS                | Per- and polyfluoroalkyl sulfonic acids                    |
| PFOA                | perfluorooctanoic acid                                     |
| PFOS                | perfluorooctane sulfonic acid                              |
| PFHXA               | perfluorooctanoic sulfonate                                |
| PFHA                | perfluorohexanoic acid                                     |
| PFBSA               | perfluorobutanesulfonic                                    |
| PFBTA               | Perfluorobutanoic acid                                     |
| PFPEA               | Perfluoropentanesulfonic acid                              |
| PFUNDA              | Perfluoroundecanoic acid                                   |
| NMEFOSAA            | N-Methyl perfluorooctane sulfonamidoacetic acid            |

## 43 **Introduction**

44 The rising concern over per- and poly-fluoroalkyl substances (PFAS) in drinking water in the United  
45 States has prompted the federal government to identify scientific challenges that must be addressed to  
46 understand and address human health impacts (National Science and Technology Council 2023).  
47 Potential adverse health effects from PFAS include impacts on fetal development, testicular and kidney  
48 cancer, liver tissue damage, suppressed immune function, and cholesterol levels changes (US  
49 Environmental Protection Agency 2021). While there is scientific consensus that there are significant  
50 health effects associated with perfluorooctanoic acid (PFOA) and perfluorooctane sulfonic acid (PFOS),  
51 the full scope of health effects in the population related to the larger set of PFAS measured in drinking  
52 water remains unclear.

53 Recent systematic evidence maps conducted by EPA researchers found limited epidemiological  
54 studies on cardiovascular endpoints related to PFAS exposure (Carlson, Angrish et al. 2022, Radke,  
55 Wright et al. 2022). Most epidemiological studies focused on acute clinical outcomes, such as heart  
56 attack-related hospitalizations, with few examining chronic conditions like hypertension, hyperlipidemia,  
57 or type-2 diabetes. These reviews identified few epidemiologic studies of cardiovascular endpoints in  
58 cross-sectional studies in the general population and even fewer in cohort studies. Most of these  
59 epidemiological studies were of acute clinical endpoints, such as deaths and hospitalizations for  
60 myocardial infarctions, and few have examined the effect of exposure on development of chronic health  
61 conditions such as the incidence of new diagnoses of major cardiovascular conditions, such as  
62 hypertension, hyperlipidemia, or type-2 diabetes.

63 Relative to the widespread use of these chemicals and known health effects, the evidence for  
64 population level health burden is still sparse, primarily due to the scarcity of exposure data. Although  
65 fluorosurfactants (principally PFOS and PFOA) have been detected in drinking water supplies throughout  
66 the US (Hu, Andrews et al. 2016, Guelfo and Adamson 2018), the assessment of the public health  
67 burden has been challenging; the exposures have not been systematically measured until recent history  
68 and PFAS is not generally measured in water used for consumption such as tap water. Simultaneously,  
69 PFAS exposures are both ubiquitous and differential with respect to many known determinants of  
70 chronic health conditions, such as income, race, sex, and occupation and there is an extensive lag time  
71 between exposure and the development of disease.

72 This study aims to assess the burden of chronic health conditions associated with PFAS exposure in  
73 groundwater well sources of drinking water. More specifically, the study estimates the risk associated  
74 with the annual incidence of common chronic health conditions among Medicare beneficiaries and  
75 identifies outcomes of highest concern for burden assessment at the population level. Propensity scores  
76 are employed to account for non-random sampling of wells and non-random use of groundwater for  
77 drinking. Additionally, several chronic health conditions are assessed as negative controls to identify  
78 potential unmeasured confounding related to smoking, frailty, and social isolation. The analysis  
79 quantifies outcomes with strongest association in response to PFAS exposure, the impact of each  
80 potential source of bias and offers recommendations for future analytical approaches.

## 81 **Methods**

82 To estimate the burden of chronic health conditions associated with PFAS exposure we identified  
83 health outcomes from Centers for Medicare and Medicaid Services' Chronic Conditions Warehouse, and  
84 exposure levels in groundwater well sources of drinking water. Additionally, areal and well level  
85 information about sociodemographic population characteristics, landcover types, and the presence of  
86 known and potential PFAS sources were used to control for confounding.

87 Health Outcome Data

88 We obtained individual-level information on chronic health conditions among Medicare  
89 beneficiaries from the Centers for Medicare and Medicaid Services' Chronic Conditions Warehouse. For  
90 each Medicare beneficiary, these annual files provide indicators for 27 chronic health conditions as well  
91 as their annually updated ZIP-code of residence (US Department of Health and Human Services 2023).  
92 Since Medicare is exceptional for those under 65 years, we restricted our analysis to Medicare  
93 beneficiaries aged 65 years and older for whom coverage is nearly universal.

94 The 27 chronic health conditions were separated into nine common conditions (cataract, chronic  
95 kidney disease, hypertension, congestive heart failure, hyperlipidemia, anemia, diabetes,  
96 rheumatoid/osteo arthritis, ischemic heart disease), eight less common conditions (chronic obstructive  
97 pulmonary disease (COPD), stroke, atrial fibrillations, glaucoma, hyperplasia, acquired hypothyroidism,  
98 osteoporosis, Alzheimer's, and dementia), and three negative controls (lung cancer, depression, and hip  
99 fracture). We excluded from the analysis seven outcomes that averaged less than one incident case per  
100 year in a ZIP code: prostate cancer, breast cancer, endometrial cancer, colorectal cancer, asthma,  
101 Alzheimer's, and acute myocardial infarction. We used indicators of each chronic health condition to  
102 calculate the annual incidence of newly diagnosed conditions over the seven-year period (2011-2017)  
103 for each ZIP code of residence.

104 For each ZIP code of residence, each unique beneficiary with an incident chronic health condition at  
105 any time during the seven-year study period contributed one count to the incidence of the  
106 corresponding condition. Person-years at risk were calculated in a similar manner; for each ZIP code of  
107 residence, each unique beneficiary contributed a beneficiary-year at risk for every year that they did not  
108 have the condition as well as the year in which they were first diagnosed.

109 Medicare beneficiary residential ZIP codes (postal delivery routes assigned by the US Postal Service)  
110 were mapped to both ZIP code population weighted centroids (US Department of Housing and Urban  
111 Development 2023) and ZIP Code Tabulated Areas (ZCTAs) (US Bureau of the Census 2023). In this  
112 process, multiple ZIP codes may have been mapped to the same ZCTA (2,444 ZIP codes were mapped to  
113 1,756 ZCTAs).

114 PFAS Groundwater Concentrations

115 PFAS concentrations in groundwater were obtained from California's Groundwater Ambient  
116 Monitoring and Assessment (GAMA) program, a collaboration between the U.S. Geological Survey and  
117 California's State Water Resources Control Board, which began testing domestic and public supply wells  
118 for PFAS in 2018 (US Geological Survey 2023). Well location data and PFAS sampling results were  
119 downloaded from the GAMA website for the period 2018 until 2021, however most samples were  
120 analyzed in recent periods (California Water Boards 2023).

121 Individual wells may have been tested several times for multiple PFAS species and all results were  
122 reported in nanograms per liter (ng/L). Values reported as less than the detection limit were interpreted  
123 as non-detects and converted to zero before calculating exposure; however, minimum detection limits  
124 varied by PFAS testing method. Maximum PFAS concentrations at individual wells were aggregated to  
125 the ZCTA-level as an inverse squared distance weighted concentration averaged across all wells within  
126 20-km of the ZCTA population centroid, with wells closest to the centroid contributing the most weight.

127

128 Sociodemographic Data

129 Population characteristics, including age, race, and income, were downloaded from the US Census  
130 Bureau's 5-year American Community Survey (ACS-5) for all ZCTAs and census tracts in California for the  
131 year 2015 (US Bureau of the Census 2023). Additional sociodemographic data were retrieved from  
132 California's Office of Environmental Health Hazard Assessment's CalEnviroScreen 4.0 (CES) dataset  
133 which is an interactive mapping tool and database of environmental, socioeconomic, and public health  
134 data (California Office of Environmental Health Hazard Assessment 2023). The CES data were available  
135 by census tract, and for the purpose of the analysis they were averaged for all census tracts within each  
136 ZCTA as well as linked to the wells found within the census tract.

#### 137 PFAS Source

138 Locations of industries such as airports, fire training facilities, chemical manufacturing sites, and  
139 waste management sites registered through USEPA's Enforcement and Compliance History Online  
140 (ECHO) database and included in EPA's PFAS Analytics Tools were treated as potential PFAS sources in  
141 this study ('PFAS Sources', 23 variables, Table S1) (US Environmental Protection Agency 2023).  
142 Although, except for most military installations, this dataset does not include any actual data or  
143 confirmation about each facility's PFAS use or discharge, these industry points are considered to have  
144 some relevance to PFAS use or discharge. Potential PFAS sources were counted within well site buffers  
145 (1- and 5-km) and ZCTAs by industry sector, and distances to the nearest PFAS industry source were  
146 measured from well sites. The number of PFAS industry sources were included as predictors of the  
147 exposure and were not considered to be on the pathway between PFAS concentration and health  
148 outcomes.

#### 149 Landcover Data

150 Land use and landcover data were obtained from the Multi-Resolution Land Characteristics  
151 Consortium's 2016 National Land Cover Dataset (NLCD) (Dewitz and Survey 2021, Wickham, Stehman et  
152 al. 2021). The NLCD uses Landsat imagery to classify landcover into 16 categories at a 30m resolution for  
153 the entire US. The NLCD Land Cover Change Index raster dataset, which measures changes in landcover  
154 types between 2001-2019, was also included in this analysis. The NLCD also provides a raster of urban  
155 imperviousness that assigns each 30m pixel a value of percent developed impervious cover, for example,  
156 pavement and rooftops. Landcover data were summarized within California's ZCTAs as well as within 1-  
157 and 5-km buffers around each well site. Local soil characteristics, including percent organic matter,  
158 percent clay, and pH, were summarized at each well site with data from the POLARIS database (Chaney,  
159 Wood et al. 2016, Moro Rosso, de Borja Reis et al. 2021). Elevation (meters above sea level) was  
160 estimated at each well site using the "elevatr" package in R (Hollister, Shah et al. 2022).

#### 161 Statistical approach

162 We used Poisson regression ("glm" package in R) (R Core Team 2022) to model the incidence of  
163 chronic health conditions as a function of PFAS concentrations (ng/L) in the groundwater. We first  
164 restricted study area to regions where at least 25 percent of drinking water was sourced from  
165 groundwater wells. This restriction was not based on PFAS groundwater concentrations nor incidence of  
166 chronic health conditions. However, to control for potential selection bias and for confounding by  
167 common causes introduced by choice of drinking water source we developed a propensity score ('GW  
168 PS'). Second, we consider the possibility that wells were not tested at random and may have been  
169 differentially sampled with respect to unknown factors. To adjust for selection bias due to preferential  
170 sampling of wells, we also developed a well testing propensity score ('Testing PS') defining the  
171 probability of a well being tested based on measured covariates. Both propensity scores were included  
172 in the model as natural splines with three degrees of freedom.

173 Additionally, three population-level variables that are known determinants of health were added to  
174 the regression ('Regional Determinants of Health'; percent of workforce employed in agriculture,  
175 percent Hispanic ethnicity, and percent with a disability). The prevalence of smoking ('Smoking') was  
176 unknown, both for the general population and for Medicare beneficiaries. Smoking is known to be the  
177 overwhelming cause of lung cancer and any contribution of PFAS must be orders of magnitude less, so  
178 we used lung cancer incidence as a surrogate to account for the unmeasured variation in the prevalence  
179 of smoking across the ZCTAs in the study area.

180 Finally, we adjusted for two sets of covariates that may predict the exposure: covariates related to  
181 the known and potential sources of PFAS ('PFAS Sources', 23 variables, Table S2) and covariates that  
182 were indicative of PFAS concentrations ('PFAS Covariates', 10 variables, Table S2).

183 We also considered depression and hip fracture, as negative controls to assess residual  
184 confounding by unknown or omitted sources of confounding. These outcomes have no known biological  
185 mechanisms that link the incidence of disease to PFAS exposure. However, we expect there may be  
186 other factors associated with negative controls and PFAS that are also likely to confound the association  
187 with other outcomes of interest. Therefore, the common causes of exposure to PFAS and outcome are  
188 hypothesized to be like the common causes of exposure to PFAS and incidence of chronic conditions.  
189 These factors may be directly or indirectly measured through variables describing the residential  
190 location, type of employment, proximity to sources, demographic characteristics, etc. Since social  
191 isolation is the major risk factor for depression, we believe that there exists no biological relationship  
192 between PFAS and depression. Any residual association between PFAS and depression would be  
193 evidence of residual confounding. We did not find literature reporting a direct link between hip fracture  
194 with PFAS exposure. The major risk factor for hip fracture is fall and age, but factors such as arthritis and  
195 osteoporosis may contribute to the severity of outcomes associated with hip fracture. Those outcomes  
196 are analyzed separately.

197 Propensity score for PFAS testing

198 Groundwater wells were not randomly selected for PFAS testing which can potentially lead to  
199 selection bias in the analysis. To account for potential selection bias, we estimate the probability of each  
200 well being selected for PFAS testing (testing propensity score). We take advantage of the large and  
201 comprehensive characterization of residential and potential PFAS sources within 1-km and 5-km radii of  
202 each well and use extreme gradient boosting, XGBoost algorithm (Chen and Guestrin 2016), to predict  
203 the probability of a well being tested for PFAS. More specifically, the following variables were  
204 summarized at the well (buffer) level and used in the XGBoost algorithm: the Californian hydrologic  
205 region (<https://gis.data.ca.gov/datasets/2a572a181e094020bdaeb5203162de15/explore>) that the well  
206 is in, land use and landcover variables from the NLCD, location of potential industrial PFAS sources (EPA  
207 PFAS Analytics Tool), population characteristics (CES and US Census, ACS), soil characteristics (POLARIS),  
208 and elevation.

209 The XGBoost model was fit in two stages using the test-set validation approach. The model in the  
210 first stage was fit on a random subset containing 90% of wells, with the optimal number of gradient  
211 boosting rounds determined via early stopping with ten rounds, using the other 10% of wells as a  
212 validation set. That is, the optimal round is the last round after which performance on the validation set  
213 doesn't improve for ten rounds. The model in the second stage was then fit on all wells, with the  
214 optimal number of rounds found in the first stage. The other parameters of the model are set to the  
215 defaults as in the "xgboost" package in R (<https://xgboost.readthedocs.io/en/stable/parameter.html>).  
216 This model was then used to predict propensity scores for all the wells. We aggregated propensities to  
217 the ZCTA-level as an inverse distance weighted concentration averaged across all PFAS-tested wells  
218 within 20-km of the ZCTA population centroid, as with PFAS concentrations.

219 Propensity score for drinking water from ground sources

220 We consider groundwater consumption in the epidemiological model for PFAS in groundwater.  
221 While we estimated 22% of Californians rely on groundwater as their primary source of drinking water,  
222 this proportion varies considerably by county. In the study area, the overall proportion was 54%. Data  
223 on public water systems, including population served and whether sourced from groundwater or surface  
224 water, were downloaded from California's Public Water System Information Dataset (PWSID) (California  
225 State Water Resources Control Board. 2019). These water-source estimates were combined with  
226 estimates of population served by private drinking water wells (Johnson, Belitz et al. 2019) to calculate  
227 percent of county population drinking from groundwater. We restricted the study region to ZCTAs with  
228 population centroids within the 40 counties where 25% or more of the population rely on groundwater  
229 for their drinking water.

230 To account for potential selection bias from restricting our analysis to the specified ZCTAs, we  
231 calculate the second propensity score for each ZCTA (probability of selection in the study region). We  
232 use extreme gradient boosting (Chen and Guestrin 2016) to calculate the propensity scores, as earlier.  
233 However, for the two-stage test-set validation approach, the model was trained on 80% of the ZCTAs  
234 and validated on the other 20%; the validation set has a larger proportion to adjust for the smaller  
235 number of ZCTAs. We predicted these propensity scores conditional on ZCTA-level variables: land use  
236 and landcover variables (NLCD), location of potential industrial PFAS sources (EPA PFAS Analytics Tool),  
237 and population characteristics (CES and US Census, ACS).

238 Statistical models

239 For each outcome of interest, we fit seven models (M1-M7) for weighted PFAS concentrations as a  
240 treatment variable of interest. M1 (Base Model) used the log count of the total Medicare beneficiaries  
241 (population-at-risk) as an offset. The subsequent models were cumulative adjustments to the basic  
242 model: M2 (+ Testing PS) adds the PFAS-well testing propensity score to control for potential selection  
243 bias; M3 (+ GW PS) adds the propensity score for the proportion of drinking water from groundwater;  
244 M4 (+ Regional Determinants of Health) adds three major regional health determinants for the total  
245 population, including percent working in agriculture industry, percent Hispanic and percent with  
246 disability; M5 (+ Smoking) adds lung cancer incidence as a surrogate for smoking prevalence. Finally,  
247 model M6 (+ PFAS Sources) adds known industrial PFAS sources (Supplemental Table S1) and M7 (+  
248 PFAS Covariates) adds additional covariates (not including sources) that were related to high levels of  
249 PFAS (Supplemental Table S2).

250 Sensitivity analysis was conducted with respect to the exposure metric. In addition to the weighted  
251 metric used in the main analysis, we also considered unweighted, and propensity weighted metric. The  
252 propensity weighted metric was constructed as  $\sum_{i \in D_i} w_i (S_i/p_i) PFAS_i$ , where  $w_i$  is the distance weight  
253 of the well to the population centroid of ZCTA,  $S_i$  is the indicator of a sampled location, and  $p_i$  is the  
254 propensity score of the sampling and the summation is over sampled locations in  $D_s$ . Rescaling the  
255 original propensity score  $p_i = p_i^0/C$ , where  $C = N/(\sum_{i \in D_a} S_i/p_i^0)$  provides a property of  
256  $\sum_{i \in D_a} S_i/p_i = N$ . As a result, the constructed propensity weighted metric approximates the weighted  
257 average of PFAS had all the wells in the ZCTA  $D_s$  been sampled  $\sum_{i \in D_s} w_i PFAS_i$ . This metric estimates  
258 the total exposure for this ZCTA and adjusts for preferential sampling by weighting.

259 Results are reported as the percent difference in the annual incidence of a chronic condition for a  
260 10.0 ng/L increment in estimated PFAS groundwater concentrations, which corresponds to the 80<sup>th</sup>  
261 percentile of the PFAS distribution in the study area. To recapitulate, PFAS groundwater concentrations  
262 are estimated for each ZCTA as the inverse distance-squared weighted mean of the well-specific  
263 maximum PFAS-species concentration for tested wells within 20-km of the ZCTA population centroid.



## 264 Results

265 The study cohort included 1.7 million Medicare beneficiaries aged 65 years and older living within  
266 523 ZCTAs (Figure 1). The greatest reduction in the study cohort was the restriction of the study to  
267 beneficiaries residing in California counties with over 25% of their drinking water derived from  
268 groundwater, which excluded many of the major urban centers (Figure 1 inset map). Compared to all of  
269 California, the population of the study area had greater proportions of Hispanic ancestry, with  
270 disabilities and employed in agriculture (Table 1). The study area had a slightly higher incidence of the  
271 eight most prevalent chronic health conditions, but a similar incidence of lung cancer, which was used as  
272 a proxy for smoking prevalence (Table 1).

273 Among the more than 20,000 wells extracted from the GAMA database, only 2,773 (14%) were  
274 tested for PFAS. Statewide, the highest PFAS groundwater concentrations were observed at wells near  
275 the most urbanized areas with low groundwater usage for drinking which were not located within the  
276 study area (for example, Los Angeles, San Francisco, and San Diego) suggesting that regions less reliant  
277 on ground sources of drinking water have more contamination and are tested more often. Within the  
278 study area, 1,647 wells were tested for PFAS and 589 (36%) had detectable levels of PFAS, with higher  
279 PFAS concentrations observed at wells near or within urban areas (for example, Fresno, Redding, and  
280 San Luis Obispo). Although the highest PFAS concentrations were outside the study area, the overall  
281 distributions of PFAS concentrations within the study area were remarkably similar to those of  
282 California overall (Table 1).

283 The exposure metric is calculated using the maximum sample at each well regardless of PFAS  
284 species. As such, only a handful of the tested PFAS species were represented as the exposure metrics,  
285 since 98% of wells' maximum PFAS measurements were from just five species – PFOS, PFHXS, PFOA,  
286 PFHA, and PFBSA (Table S4). These five species are either perfluoroalkyl sulfonic or perfluoroalkyl  
287 carboxylic acids with chain lengths ranging from 4 to 8 carbons. Four additional PFAS species (PFBTA,  
288 PFPE, PFUNDCA, NMEFOSAA) were also detected in study area wells, but were never the maximum  
289 measured species for any well.

290 Based on our analysis of testing propensity, the average probability of a groundwater well being  
291 tested for PFAS was 89.1% for wells with detectable levels of PFAS and 83.2% for wells without  
292 detectable levels of PFAS, indicating that contaminated wells were more likely to be tested than non-  
293 contaminated wells. Variables most influential in prediction of well testing were increased land  
294 development (“developed, medium-intensity”, an NLCD category) within 5-km of the well, presence of  
295 1,2,3-trichloropropane (an industrial solvent), decreased levels of chromium 6 and uranium, and shorter  
296 distance to national defense industry sites. The presence of PFAS sources explained only 3% of  
297 variability ( $R^2$ ) in PFAS concentration across wells.

298 The incidences of chronic health conditions were associated with a 10 ng/L increment in PFAS  
299 groundwater concentrations with the strongest associations observed for hypertension 1.15% (1.01,  
300 1.30), cataract 1.50% (1.35, 1.66), chronic kidney disease 0.83% (0.68, 0.99), and COPD 1.21% (1.01,  
301 1.42) for the final covariate model (Table 2, Table S4). Adjustments for PFAS testing propensity and for  
302 varying use of groundwater for drinking water produced little change in estimates, but the three  
303 regional health covariates and smoking (that is, the ZCTA-specific incidence of lung cancer) were strong  
304 confounders as shown by the change in estimates. Ischemic heart disease as a chronic health condition  
305 represents a cohort of heart attack survivors and these results suggest that PFAS may have a negative  
306 impact on heart attack survival. Adjustments for PFAS sources (23 degrees of freedom) and for other  
307 covariates (10 degrees of freedom) showed little evidence of additional confounding although addition  
308 of PFAS sources generally increased the effect estimates.

309 Associations for other non-cancer chronic health conditions generally had small but positive  
310 estimated risk, except for asthma and ischemic heart disease (Figure 2). The associations for some  
311 outcomes were sensitive to one largest PFAS value observed in Mariposa County. After removing this  
312 maximum value, associations between PFAS and anemia, asthma, and diabetes were null. For all other  
313 outcomes estimates of risk were consistent and similar in magnitude (Figure S3).

314 Many of these chronic health conditions share common etiologies and these results may reflect  
315 shared pathways of action. We performed a mediation analysis to assess whether PFAS associations  
316 were mediated by the strong association between PFAS and hypertension, a known risk factor for other  
317 chronic health conditions. Hypertension is also the most prevalent condition and has the largest rate of  
318 co-occurrence with other conditions. With the addition of hypertension to the model, the PFAS direct  
319 effect was reduced to 0.56 (95% CI 0.40, 0.71) for chronic kidney disease, 0.76 (95% CI 0.61, 0.92) for  
320 cataract, and 0.94 (95% CI 0.73, 1.15) for chronic obstructive pulmonary disease. The proportion of the  
321 total effect mediated by hypertension was greatest for cataracts (49%), chronic kidney disease (33%),  
322 and chronic obstructive pulmonary disease (22%). These results suggest that hypertension mediated a  
323 considerable portion, but not all, of the association between PFAS and these other chronic health  
324 conditions.

## 325 Discussion

326 Exposure to PFAS is a national public health concern with a growing need for population level risk  
327 assessment. In this study, we characterized the association between PFAS in the groundwater wells and  
328 the incidence cases of chronic disease in a large population of Medicare beneficiaries aged 65 years and  
329 older residing in California between 2011 and 2017. The study area was a region where approximately  
330 54% of population receives drinking water from ground water and the exposure was determined as a  
331 distance-weighted mean of the maximum PFAS concentrations at each groundwater well in the postal  
332 code of Medicare beneficiaries. We observed the strongest association for the incidence of  
333 hypertension, chronic kidney disease, COPD, and cataract; however, the incidence of other chronic  
334 diseases (congestive heart failure, stroke, atrial fibrillations, diabetes, glaucoma, osteoarthritis, anemia,  
335 acquired hypothyroidism, benign prostatic hyperplasia, and Alzheimer's/dementia) were also positively  
336 associated with PFAS exposure.

337 Incidence of hypertension was increased by one percent (1.15, 95% CI 1.01, 1.30) for a 10 ng/L  
338 increment of PFAS. To place this small rate increment in context, the average annual incidence of  
339 hypertension in the study area was 10.1 percent or about 170,000 new cases of hypertension annually.  
340 A one percent increase in this rate would add 1,700 additional cases of hypertension each year among  
341 the approximately 1.7 million Medicare beneficiaries in the study area.

342 An association between PFAS and hypertension has been previously reported. Cardiovascular  
343 disease has been linked to PFAS by experimental and epidemiologic studies (Meneguzzi, Fava et al.  
344 2021) (Meneguzzi, Fava et al. 2021, Wen, Wang et al. 2022). Hypertension and dyslipidemia have been  
345 linked to serum PFAS among Norwegian adolescents (Averina, Brox et al. 2021), US women (Ding,  
346 Karvonen-Gutierrez et al. 2022) and adolescents (Ma, Xu et al. 2019), and to PFAS drinking water  
347 contamination among North Carolina adults (Ward-Caviness, Moyer et al. 2022). Preeclampsia, acute  
348 onset hypertension in pregnant women, and other reproductive related outcomes were found to be  
349 associated with PFAS in two large systematic reviews (Gao, Ni et al. 2021, Rickard, Rizvi et al. 2022). This  
350 study is the first to provide an estimate of the burden of PFAS in groundwater on clinically reported  
351 hypertension among a general population aged 65 years and older. An adverse association between  
352 PFOS and preeclampsia (acute hypertension in pregnancy) was first reported for women enrolled in a  
353 study of a major industrial release of PFAS in the Mid-Ohio River Valley in the United States (Stein, Savitz

354 et al. 2009, Avanasji, Shin et al. 2016). Adverse associations between PFAS and preeclampsia were also  
355 found in Sweden (Rylander, Lindh et al. 2020), Denmark (Birukov, Andersen et al. 2021), Canada  
356 (Borghese, Walker et al. 2020), United States (Preston, Hivert et al. 2022) and China (Tian, Zhou et al.  
357 2023) but results from a Norwegian cohort were equivocal (Starling, Engel et al. 2014).

358 The results reported here are consistent with a previous study in North Carolina based on  
359 electronic health records (Ward-Caviness, Moyer et al. 2022). That study also reported similar  
360 associations between presence of any PFAS detected in the drinking water system with hypertension  
361 (OR 1.32 (1.15, 1.52) ) and chronic kidney disease (OR 1.14 (0.87, 1.51)). In that study, the associations  
362 between PFAS and heart failure and diabetes were problematic due to smaller sample size, and cataract  
363 and COPD were not considered. Even though both studies were population based, they used different  
364 exposure metrics: a binary indicator of any PFAS detected in a water system versus more extensive PFAS  
365 testing of groundwater well concentrations.

366 Two outcomes had negative association with PFAS, asthma and ischemic heart disease. Both  
367 outcomes have previously been associated with PFAS but not necessarily in this age group. Here  
368 because we identify the outcomes as the incident cases that have occurred for the first time after age  
369 65, we suspect that we may have conditioned on the population that is less likely to be newly diagnosed  
370 with these two outcomes, like the healthy survivor bias. More specifically, new incidence of asthma is  
371 rare in older adults while ischemic heart disease is diagnosed only in the surviving cases (~75%).

372 The mediation analysis suggested that hypertension was an important mediator of the PFAS  
373 association with other chronic health conditions, especially for cataracts and chronic kidney disease but  
374 less so for chronic obstructive pulmonary disease. Even after consideration of hypertension, PFAS  
375 exposure still showed direct effects on these other conditions suggesting that the PFAS association is not  
376 entirely mediated by hypertension. The relationship of hypertension with cataracts and chronic kidney  
377 disease has previously been established (Yu, Lyu et al. 2014, Hamrahan and Falkner 2017). The causal  
378 relationship between hypertension and chronic obstructive pulmonary disease is more complex as the  
379 loss of lung structure may cause hypertension (Kim, Park et al. 2017). Nevertheless, the results of this  
380 study indicate that PFAS has a direct association with these chronic health conditions beyond that  
381 mediated by hypertension. Ward-Caviness et al. (Ward-Caviness, Moyer et al. 2022) similarly indicated  
382 that the health effects of the exposure to PFAS are not specific and may be associated with multiple  
383 chronic conditions.

#### 384 Strengths and weaknesses

385 This study has several strengths and weaknesses. For those over the age 65, Medicare coverage is  
386 essentially universal. Thus, data collected on new incidence of chronic disease is representative of the  
387 population in the same age group in the study region. A unique strength of Medicare beneficiary  
388 summaries is that the chronic diseases are tracked over all beneficiaries and the incidence and  
389 prevalence rates can be fully enumerated. Nevertheless, to our knowledge there have not been other  
390 studies of PFAS effects using beneficiary files.

391 In this analysis we paid close attention to various sources of potential bias including preferential  
392 sampling of PFAS and confounding. We carefully considered selection bias from the non-random  
393 sampling of wells for PFAS testing, but the adjustment by a testing propensity score showed minimal  
394 impact on the PFAS effect estimates. The restriction of the study area to California counties where more  
395 than 25% of drinking water comes from groundwater was also adjusted by a propensity score for  
396 groundwater use and several demographic characteristics associated with the selection. The adjustment  
397 had minimal impact on the PFAS effect estimates (Table 2), but the reported findings ought not to be  
398 extrapolated to areas that were excluded from the analysis. For example, the region around Los Angeles

399 has a number of wells with detected PFAS levels however, the region is estimated to have low reliance  
400 on the use of ground water sources for drinking. Additionally, some of the outcomes that had the  
401 largest risk estimates, such as cataract, have previously been noted to have both genetic and age  
402 dependent risk factors. Although conceivable that an association exists between average age in  
403 population and average PFAS concentration and that the outcome of interest is a surrogate for age, the  
404 risk estimates did not change after adjusting for age.

405 PFAS sources had a small suppression effect (MacKinnon, Krull et al. 2000), which when added to  
406 the model increased the effect estimates across most outcomes. The small explanatory power of PFAS  
407 sources suggest that presence of sources cannot act as an Instrumental variable and therefore cannot  
408 be a substitute for the direct exposure measurements. However, the addition of these variables can  
409 increase the magnitude and improve the overall model.

410 This study is a cross sectional analysis of chronic condition incidence and PFAS exposure in ground  
411 water used for drinking water, and as such is subject to several sources of potential confounding. The  
412 major confounders in the analysis were the three regional determinants of health (Hispanic ethnicity,  
413 disabilities, and agricultural employment) and the incidence of lung cancer as a surrogate for tobacco  
414 smoking (Table 2). Adjustment for the three regional variables increased the PFAS associations, while  
415 the adjustment for lung cancer reduced these associations. Among other limitations, smoking status of  
416 beneficiaries was not available and lung cancer incidence is used to characterize population level rates  
417 of smoking. Tobacco smoking does have a strong independent association with hypertension and partial  
418 adjustment for smoking using lung cancer incidence shows a large change in estimate, reflecting  
419 considerable confounding. The adjustment by the propensity scores for groundwater use showed less  
420 evidence of confounding. The widths of the confidence intervals for each chronic condition do not  
421 change much across the epidemiologic models (Table 2), providing no evidence of overfitting. This lack  
422 of variance inflation persists even for meaningful changes in the point estimates.

423 This study is an ecological study of a shared environmental exposure within the ZIP code of  
424 residence. Population level assessments are challenging due the lack of a comprehensive sampling  
425 strategy for PFAS. In this study, we used measurements for PFAS in groundwater from GAMA data  
426 repository of various sampling campaigns. While possible, measurement errors are unlikely to have  
427 varied across ZCTAs differentially with the incidence of chronic health conditions. Similarly, the clinical  
428 diagnosis of chronic health conditions supplied by the Medicare data is unlikely to have been influenced  
429 by PFAS groundwater concentrations. Finally, temporal misalignment between sampling of PFAS,  
430 exposure, and measured outcomes in these early stages of population level investigation is a knowledge  
431 gap and should not be overlooked.

432 Future research will benefit from enhanced measurements of PFAS in drinking water sources that is  
433 ongoing in many States. In present work we use the best available data on groundwater concentrations,  
434 but measures of drinking water exposure are likely to provide direct linkage. We found that adjustment  
435 for area-level lung cancer incidence was an important confounder, which implies that smoking is likely  
436 to be an important factor for consideration in future studies. The second most influential confounders  
437 included areal-level determinants of population health, which in the study area were % hispanic  
438 population, % disability, and % employed in agriculture. Adjustment with propensity scores for the non-  
439 random sampling of wells for PFAS testing and for differences in groundwater use for drinking water  
440 produced modest changes in the estimates but are important to consider in studies of ground water  
441 exposure. The impact of groundwater use was minimized by our restriction to California counties with  
442 at least 25% of drinking water derived from groundwater. Finally, the range of chronic conditions  
443 associated with PFAS indicated non-specific modes of action. Separation of PFAS associations into direct

444 and indirect effects would be useful in resolving these pathways, as shown by our analysis using  
445 hypertension as a mediator.

446 Conclusion

447 The findings of associations between PFAS in the groundwater and the incidence of hypertension,  
448 chronic obstructive pulmonary disease, chronic kidney disease, and cataracts among Medicare  
449 beneficiaries aged 65 years and older are consistent with prior clinical and epidemiologic research and  
450 are unlikely to be due to confounding, selection bias, or measurement errors. While a small percentage  
451 increase in annual incidence of clinical hypertension may seem like a small proportion, the impact of  
452 hypertension on subsequent morbidity and mortality suggests important public health consequences.

453

## References

- 454  
455  
456 Avanasi, R., H. M. Shin, V. M. Vieira, D. A. Savitz and S. M. Bartell (2016). "Impact of Exposure  
457 Uncertainty on the Association between Perfluorooctanoate and Preeclampsia in the C8 Health Project  
458 Population." Environ Health Perspect **124**(1): 126-132.
- 459 Averina, M., J. Brox, S. Huber and A. S. Furberg (2021). "Exposure to perfluoroalkyl substances (PFAS)  
460 and dyslipidemia, hypertension and obesity in adolescents. The Fit Futures study." Environ Res **195**:  
461 110740.
- 462 Birukov, A., L. B. Andersen, M. S. Andersen, J. H. Nielsen, F. Nielsen, H. B. Kyhl, J. S. Jorgensen, P.  
463 Grandjean, R. Dechend and T. K. Jensen (2021). "Exposure to perfluoroalkyl substances and blood  
464 pressure in pregnancy among 1436 women from the Odense Child Cohort." Environ Int **151**: 106442.
- 465 Borghese, M. M., M. Walker, M. E. Helewa, W. D. Fraser and T. E. Arbuckle (2020). "Association of  
466 perfluoroalkyl substances with gestational hypertension and preeclampsia in the MIREC study." Environ  
467 Int **141**: 105789.
- 468 California Office of Environmental Health Hazard Assessment. (2023). "CalEnviroScreen." from  
469 <https://oehha.ca.gov/calenviroscreen>.
- 470 California State Water Resources Control Board. (2019). "Drinking water - public water system  
471 information. California Open Data." Retrieved August 9, 2019, 2019, from  
472 <https://data.ca.gov/dataset/drinking-water-public-water-system-information>.
- 473 California Water Boards, S. W. R. C. B. (2023, 5/20/2023). "GAMA DATA DOWNLOADS." from  
474 <https://gamagroundwater.waterboards.ca.gov/gama/datadownload>.
- 475 Carlson, L. M., M. Angrish, A. V. Shirke, E. G. Radke, B. Schulz, A. Kraft, R. Judson, G. Patlewicz, R. Blain,  
476 C. Lin, N. Vetter, C. Lemeris, P. Hartman, H. Hubbard, X. Arzuaga, A. Davis, L. V. Dishaw, I. L. Druwe, H.  
477 Hollinger, R. Jones, J. P. Kaiser, L. Lizarraga, P. D. Noyes, M. Taylor, A. J. Shapiro, A. J. Williams and K. A.  
478 Thayer (2022). "Systematic Evidence Map for Over One Hundred and Fifty Per- and Polyfluoroalkyl  
479 Substances (PFAS)." Environ Health Perspect **130**(5): 56001.
- 480 Chaney, N. W., E. F. Wood, A. B. McBratney, J. W. Hempel, T. W. Nauman, C. W. Brungard and N. P.  
481 Odgers (2016). "POLARIS: A 30-meter probabilistic soil series map of the contiguous United States."  
482 Geoderma **274**: 54-67.
- 483 Chen, T. and C. Guestrin (2016). "XGBoost: A scalable Tree Boosting System." Knowledge Discovery in  
484 Databases: 785-794.
- 485 Dewitz, J. A. and U. G. Survey. (2021). "National Land Cover Database (NLCD) 2019 Products (ver. 2.0,  
486 June 2021): U.S. Geological Survey data release."
- 487 Ding, N., C. A. Karvonen-Gutierrez, B. Mukherjee, A. M. Calafat, S. D. Harlow and S. K. Park (2022). "Per-  
488 and Polyfluoroalkyl Substances and Incident Hypertension in Multi-Racial/Ethnic Women: The Study of  
489 Women's Health Across the Nation." Hypertension **79**(8): 1876-1886.

- 490 Gao, X., W. Ni, S. Zhu, Y. Wu, Y. Cui, J. Ma, Y. Liu, J. Qiao, Y. Ye, P. Yang, C. Liu and F. Zeng (2021). "Per-  
491 and polyfluoroalkyl substances exposure during pregnancy and adverse pregnancy and birth outcomes:  
492 A systematic review and meta-analysis." Environ Res **201**: 111632.
- 493 Guelfo, J. L. and D. T. Adamson (2018). "Evaluation of a national data set for insights into sources,  
494 composition, and concentrations of per- and polyfluoroalkyl substances (PFASs) in U.S. drinking water."  
495 Environ Pollut **236**: 505-513.
- 496 Hamrahian, S. M. and B. Falkner (2017). "Hypertension in Chronic Kidney Disease." Adv Exp Med Biol  
497 **956**: 307-325.
- 498 Hollister, J., T. Shah, A. Robitaille, M. Beck and M. Johnson. (2022, 5/30/2023). "elevatr: Access Elevation  
499 Data from Various APIs." from <https://github.com/jhollist/elevatr/>.
- 500 Hu, X. C., D. Q. Andrews, A. B. Lindstrom, T. A. Bruton, L. A. Schaider, P. Grandjean, R. Lohmann, C. C.  
501 Carignan, A. Blum, S. A. Balan, C. P. Higgins and E. M. Sunderland (2016). "Detection of Poly- and  
502 Perfluoroalkyl Substances (PFASs) in U.S. Drinking Water Linked to Industrial Sites, Military Fire Training  
503 Areas, and Wastewater Treatment Plants." Environ Sci Technol Lett **3**(10): 344-350.
- 504 Johnson, T. D., K. Belitz and M. A. Lombard (2019). "Estimating domestic well locations and populations  
505 served in the contiguous US for years 2000 and 2010." Science of the Total Environment **687**: 1261-  
506 1273.
- 507 Kim, S. H., J. H. Park, J. K. Lee, E. Y. Heo, D. K. Kim and H. S. Chung (2017). "Chronic obstructive  
508 pulmonary disease is independently associated with hypertension in men: A survey design analysis using  
509 nationwide survey data." Medicine (Baltimore) **96**(19): e6826.
- 510 Ma, S., C. Xu, J. Ma, Z. Wang, Y. Zhang, Y. Shu and X. Mo (2019). "Association between perfluoroalkyl  
511 substance concentrations and blood pressure in adolescents." Environ Pollut **254**(Pt A): 112971.
- 512 MacKinnon, D. P., J. L. Krull and C. M. Lockwood (2000). "Equivalence of the mediation, confounding and  
513 suppression effect." Prev Sci **1**(4): 173-181.
- 514 Meneguzzi, A., C. Fava, M. Castelli and P. Minuz (2021). "Exposure to Perfluoroalkyl Chemicals and  
515 Cardiovascular Disease: Experimental and Epidemiological Evidence." Front Endocrinol (Lausanne) **12**:  
516 706352.
- 517 Moro Rosso, L. H., A. F. de Borja Reis, A. A. Correndo and I. A. Ciampitti (2021). "XPolaris: an R-package  
518 to retrieve United States soil data at 30-meter resolution." BMC Res Notes **14**(1): 327.
- 519 National Science and Technology Council (2023). Per- and Polyfluoroalkyl Substances (PFAS) Report. I.  
520 Joint Subcommittee on Environment, and Public Health, Washington, DC, Executive Office of the  
521 President of the United States.
- 522 Preston, E. V., M. F. Hivert, A. F. Fleisch, A. M. Calafat, S. K. Sagiv, W. Perng, S. L. Rifas-Shiman, J. E.  
523 Chavarro, E. Oken, A. R. Zota and T. James-Todd (2022). "Early-pregnancy plasma per- and  
524 polyfluoroalkyl substance (PFAS) concentrations and hypertensive disorders of pregnancy in the Project  
525 Viva cohort." Environ Int **165**: 107335.

- 526 R Core Team (2022). R: A Language and Environment for Statistical Computing. Vienna, Austria, R  
527 Foundation for Statistical Computing.
- 528 Radke, E. G., J. M. Wright, K. Christensen, C. J. Lin, A. E. Goldstone, C. Lemeris and K. A. Thayer (2022).  
529 "Epidemiology Evidence for Health Effects of 150 per- and Polyfluoroalkyl Substances: A Systematic  
530 Evidence Map." *Environ Health Perspect* **130**(9): 96003.
- 531 Rickard, B. P., I. Rizvi and S. E. Fenton (2022). "Per- and poly-fluoroalkyl substances (PFAS) and female  
532 reproductive outcomes: PFAS elimination, endocrine-mediated effects, and disease." *Toxicology* **465**:  
533 153031.
- 534 Rylander, L., C. H. Lindh, S. R. Hansson, K. Broberg and K. Kallen (2020). "Per- and Polyfluoroalkyl  
535 Substances in Early Pregnancy and Risk for Preeclampsia: A Case-Control Study in Southern Sweden."  
536 *Toxics* **8**(2).
- 537 Starling, A. P., S. M. Engel, D. B. Richardson, D. D. Baird, L. S. Haug, A. M. Stuebe, K. Klungsoyr, Q.  
538 Harmon, G. Becher, C. Thomsen, A. Sabaredzovic, M. Eggesbo, J. A. Hoppin, G. S. Travlos, R. E. Wilson, L.  
539 I. Trogstad, P. Magnus and M. P. Longnecker (2014). "Perfluoroalkyl substances during pregnancy and  
540 validated preeclampsia among nulliparous women in the Norwegian Mother and Child Cohort Study."  
541 *Am J Epidemiol* **179**(7): 824-833.
- 542 Stein, C. R., D. A. Savitz and M. Dougan (2009). "Serum levels of perfluorooctanoic acid and  
543 perfluorooctane sulfonate and pregnancy outcome." *Am J Epidemiol* **170**(7): 837-846.
- 544 Tian, Y., Q. Zhou, L. Zhang, W. Li, S. Yin, F. Li and C. Xu (2023). "In utero exposure to per-/polyfluoroalkyl  
545 substances (PFASs): Preeclampsia in pregnancy and low birth weight for neonates." *Chemosphere* **313**:  
546 137490.
- 547 US Bureau of the Census. (2023). "American Community Survey 5-Year Data (2009-2021)." from  
548 <https://www.census.gov/data/developers/data-sets/acs-5year.html>.
- 549 US Bureau of the Census. (2023). "TIGER/Line Shapefiles." 2023, from  
550 <https://www.census.gov/geographies/mapping-files/time-series/geo/tiger-line-file.html>.
- 551 US Department of Health and Human Services. (2023). "Chronic Conditions Data Warehouse." from  
552 <https://www2.ccwdata.org/web/guest/condition-categories-chronic/>.
- 553 US Department of Housing and Urban Development. (2023). "Geospatial Data Storefront." from  
554 <https://hudgis-hud.opendata.arcgis.com/>.
- 555 US Environmental Protection Agency (2021). Announcement of Final Regulatory Determinations for  
556 Contaminants on the Fourth Drinking Water Contaminant Candidate List. O. o. Water. Federal Register.  
557 **86**: 12272-12291.
- 558 US Environmental Protection Agency. (2023). "PFAS Analytic Tools." from  
559 [https://awsedap.epa.gov/public/extensions/PFAS\\_Tools/PFAS\\_Tools.html](https://awsedap.epa.gov/public/extensions/PFAS_Tools/PFAS_Tools.html).



- 560 US Geological Survey. (2023). "Groundwater Ambient Monitoring & Assessment (GAMA)." from  
561 [https://www.usgs.gov/centers/california-water-science-center/science/groundwater-ambient-](https://www.usgs.gov/centers/california-water-science-center/science/groundwater-ambient-monitoring-assessment-gama)  
562 [monitoring-assessment-gama](https://www.usgs.gov/centers/california-water-science-center/science/groundwater-ambient-monitoring-assessment-gama).
- 563 Ward-Caviness, C. K., J. Moyer, A. Weaver, R. Devlin and D. Diaz-Sanchez (2022). "Associations between  
564 PFAS occurrence and multimorbidity as observed in an electronic health record cohort." Environ  
565 Epidemiol **6**(4): e217.
- 566 Wen, X., M. Wang, X. Xu and T. Li (2022). "Exposure to Per- and Polyfluoroalkyl Substances and Mortality  
567 in U.S. Adults: A Population-Based Cohort Study." Environ Health Perspect **130**(6): 67007.
- 568 Wickham, J., S. V. Stehman, D. G. Sorenson, L. Gass and J. A. Dewitz (2021). "Thematic accuracy  
569 assessment of the NLCD 2016 land cover for the conterminous United States." Remote Sensing of  
570 Environment **257**.
- 571 Yu, X., D. Lyu, X. Dong, J. He and K. Yao (2014). "Hypertension and risk of cataract: a meta-analysis." PLoS  
572 One **9**(12): e114012.
- 573

574 Table 1. Characteristics of study area in comparison with all of California: 2011-2017. The study area  
 575 was restricted to California counties where 25% or more of the population’s drinking water was supplied  
 576 from groundwater. Unless otherwise specified, results are presented as means and interquartile ranges  
 577 across Zip Code Tabulation Areas (ZCTA).

| Characteristic                                                                                                 | All of California | Study Area        |
|----------------------------------------------------------------------------------------------------------------|-------------------|-------------------|
| Medicare beneficiaries aged 65 years and older (n)                                                             | 6,656,235         | 1,696,247         |
| ZIP-Code Tabulation Areas (ZCTA) (n)                                                                           | 1,756             | 523               |
| Percent of total population                                                                                    |                   |                   |
| Using groundwater as drinking source                                                                           | 22                | 54                |
| Hispanic ancestry                                                                                              | 29.5 (10.2, 43.6) | 35.6 (12.4, 56.1) |
| Disability                                                                                                     | 12.9 (8.4, 15.0)  | 14.3 (9.7, 17.5)  |
| Agriculture Workers                                                                                            | 6.1 (0.3, 5.2)    | 10.7 (0.9, 13.9)  |
| Annual incidence of chronic health condition per 100 Medicare beneficiary-years at risk                        |                   |                   |
| Hypertension                                                                                                   | 8.5 (5.0, 11.1)   | 10.1 (5.2, 14.3)  |
| Chronic Obstructive Pulmonary Disease                                                                          | 2.2 (1.2, 2.5)    | 2.3 (1.5, 2.9)    |
| Chronic Kidney Disease                                                                                         | 3.6 (2.5, 4.2)    | 3.9 (2.6, 5.0)    |
| Hyperlipidemia                                                                                                 | 7.6 (4.5, 10.1)   | 8.7 (4.5, 12.5)   |
| Congestive Heart Failure                                                                                       | 2.3 (1.6, 2.8)    | 2.6 (1.7, 3.1)    |
| Stroke                                                                                                         | 1.1 (0.8, 1.4)    | 1.2 (0.8, 1.5)    |
| Atrial Fibrillation                                                                                            | 1.3 (0.9, 1.6)    | 1.4 (1.0, 1.9)    |
| Diabetes                                                                                                       | 3.0 (2.0, 3.6)    | 3.4 (2.1, 4.4)    |
| Ischemic Heart Disease                                                                                         | 3.4 (2.1, 4.1)    | 3.7 (2.4, 4.7)    |
| Cataract                                                                                                       | 5.2 (2.8, 7.1)    | 5.9 (3.2, 8.4)    |
| Rheumatoid arthritis / Osteoarthritis                                                                          | 4.5 (2.7, 6.0)    | 4.9 (3.0, 6.7)    |
| Anemia                                                                                                         | 4.6 (3.0, 5.8)    | 5.0 (3.0, 6.5)    |
| Acquired Hypothyroidism                                                                                        | 2.0 (1.3, 2.5)    | 2.3 (1.5, 2.9)    |
| Benign Prostatic Hyperplasia                                                                                   | 1.5 (1.0, 1.8)    | 1.6 (1.0, 2.0)    |
| Alzheimer’s and Dementia                                                                                       | 1.6 (1.2, 2.0)    | 1.7 (1.2, 2.2)    |
| Asthma                                                                                                         | 1.0 (0.7, 1.2)    | 1.1 (0.7, 1.4)    |
| Depression                                                                                                     | 2.5 (1.7, 3.1)    | 2.6 (1.8, 3.4)    |
| Glaucoma                                                                                                       | 1.4 (0.95, 1.7)   | 1.3 (0.83, 1.7)   |
| Lung cancer                                                                                                    | 0.30 (0.15, 0.28) | 0.25 (0.14, 0.32) |
| Hip Fracture                                                                                                   | 0.39 (0.23, 0.47) | 0.41 (0.25, 0.53) |
| Testing of groundwater for per- and polyfluoroalkyl substances (PFAS) in wells within 20-km of a ZCTA centroid |                   |                   |
| Groundwater wells tested (n)                                                                                   | 2,773             | 1,647             |
| Groundwater wells with PFAS (n)                                                                                | 1,279             | 589               |
| PFAS concentrations in groundwater (ng/L)                                                                      | 11.7 (0.34, 10.7) | 9.8 (0.0, 6.9)    |

578 Table 2. Estimated percent difference (and 95% confidence intervals) in annual incidence of selected chronic health conditions for a 10 ng/L  
 579 increment in distance weighted mean of per- and polyfluoroalkyl substances (PFAS) groundwater concentration by epidemiologic model:  
 580 1,696,247 Medicare beneficiaries over age 65 living in California counties with more than 25% of drinking water from groundwater, 2011-2017.

|                                       | Epidemiologic model  |                      |                      |                                   |                       |                       |                                 |
|---------------------------------------|----------------------|----------------------|----------------------|-----------------------------------|-----------------------|-----------------------|---------------------------------|
|                                       | Base Model           | + Testing PS         | + GW PS              | + Regional Determinants of Health | + Smoking             | + PFAS Sources        | + PFAS Covariates "Final Model" |
| Model Degrees of Freedom              | 2                    | 5                    | 8                    | 11                                | 14                    | 37                    | 47                              |
| Hypertension                          | 0.92<br>(0.78, 1.07) | 0.66<br>(0.51, 0.81) | 0.78<br>(0.63, 0.93) | 2.00<br>(1.86, 2.14)              | 1.12<br>(0.99, 1.26)  | 1.25<br>(1.11, 1.39)  | 1.15<br>(1.01, 1.30)            |
| Chronic Obstructive Pulmonary Disease | 1.40<br>(1.2, 1.6)   | 1.32<br>(1.12, 1.53) | 1.69<br>(1.48, 1.9)  | 1.87<br>(1.67, 2.07)              | 1.04<br>(0.85, 1.24)  | 1.32<br>(1.12, 1.53)  | 1.21<br>(1.01, 1.42)            |
| Chronic Kidney Disease                | 0.66<br>(0.51, 0.82) | 0.59<br>(0.44, 0.75) | 0.77<br>(0.62, 0.93) | 1.32<br>(1.17, 1.47)              | 0.73<br>(0.58, 0.88)  | 0.84<br>(0.68, 0.99)  | 0.83<br>(0.68, 0.99)            |
| Cataract                              | 2.37<br>(2.21, 2.53) | 2.19<br>(2.02, 2.35) | 1.97<br>(1.80, 2.14) | 2.52<br>(2.37, 2.68)              | 1.68<br>(1.53, 1.83)  | 1.73<br>(1.57, 1.88)  | 1.50<br>(1.35, 1.66)            |
| Depression                            | 0.43<br>(0.24, 0.62) | 0.36<br>(0.16, 0.55) | 0.34<br>(0.14, 0.54) | 0.58<br>(0.39, 0.77)              | 0.15<br>(-0.04, 0.33) | 0.20<br>(0.00, 0.39)  | 0.09<br>(-0.10, 0.28)           |
| Hip Fracture                          | 1.01<br>(0.59, 1.43) | 1.00<br>(0.57, 1.43) | 0.99<br>(0.56, 1.43) | 0.78<br>(0.36, 1.19)              | 0.26<br>(-0.15, 0.67) | 0.34<br>(-0.08, 0.77) | 0.11<br>(-0.32, 0.54)           |

581 Notes:

582 Base model: A conditional Poisson model for incidence of chronic health condition in a Zip Code Tabulation Area (ZCTA) and distance-weighted  
 583 mean of well-specific maximum PFAS concentration within 20-km of ZCTA population centroid with an offset for beneficiary-years at risk.

584 + Testing PS: Previous model with a propensity score (PS) for PFAS testing based on land-use near well.

585 + GW PS: Previous model with a propensity score (PS) for county indicators of use of groundwater (GW) for drinking water.

586 + Regional Determinants of Health: Previous model with percent working in agriculture, percent Hispanic, and percent with disability.

587 + Smoking: Previous model plus the incidence of lung cancer as an estimate for smoking prevalence.

588 + PFAS Sources: Previous model plus 23 industrial sector-specific counts of PFAS sources in ZCTA (supplemental table S1).

589 + PFAS Covariates: Previous model plus 10 covariates indicative of high PFAS concentrations (supplemental table S2).

590 Figure 1. Flow diagram showing restrictions to cohort in number of Medicare beneficiaries and ZIP Code  
591 Tabulation Areas (ZCTAs) with inset map of California counties showing proportion of population  
592 supplied with drinking water derived from groundwater: 2011-2017.

593

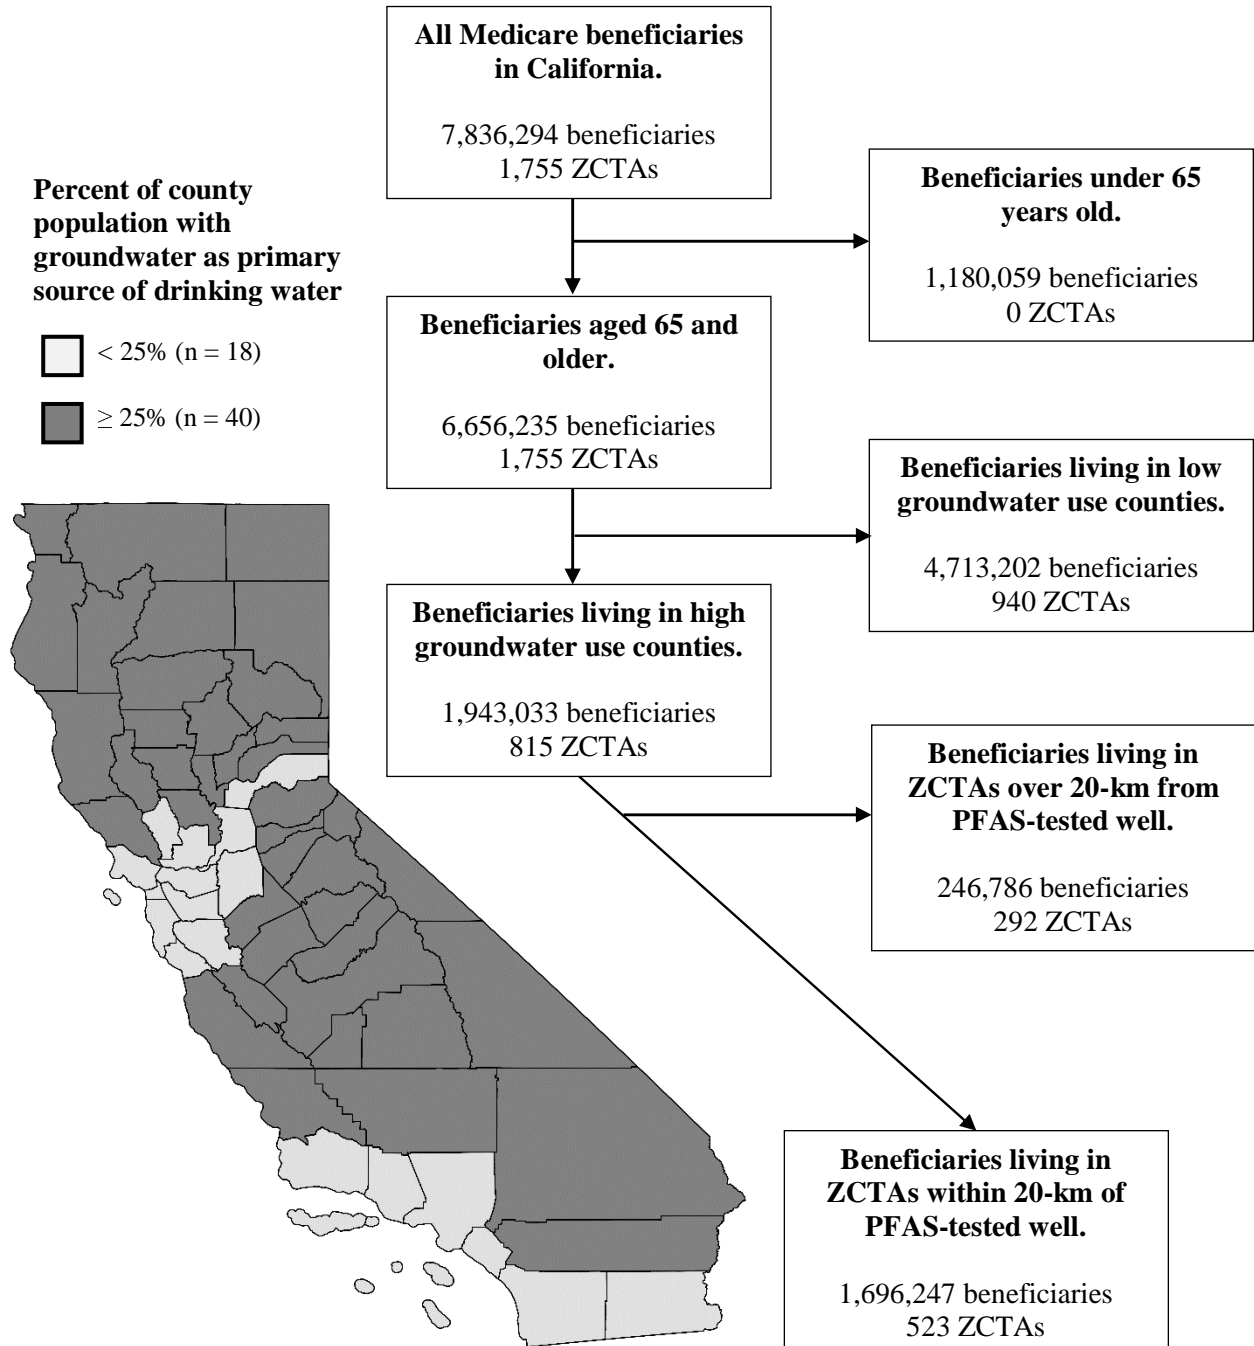

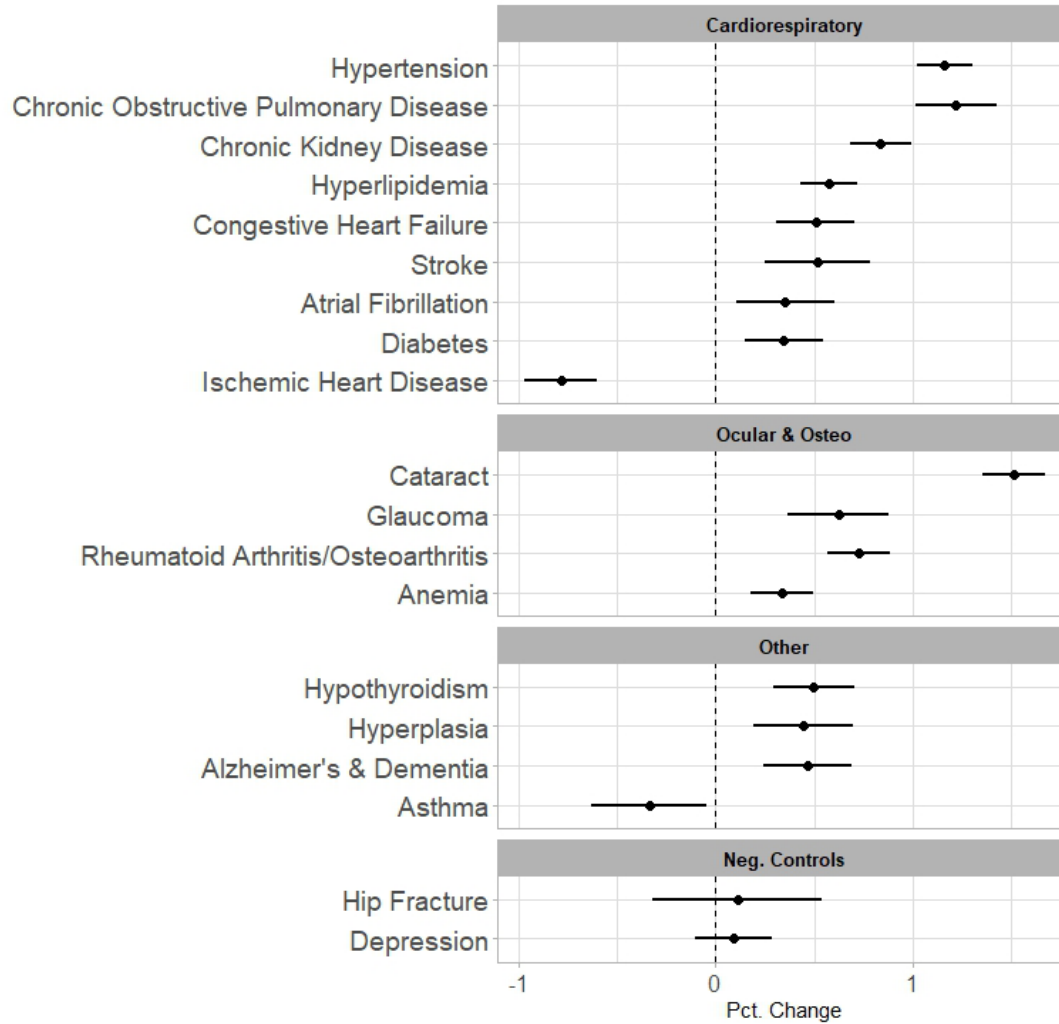

594

595 Figure 2. Estimated percent difference in incidence of 19 chronic health conditions for a 10 ng/L  
 596 increment in distance-weighted mean of per- and polyfluoroalkyl substances (PFAS) groundwater  
 597 concentration (and 95% confidence intervals) for final epidemiologic model: 1,696,247 Medicare  
 598 beneficiaries over age 65 living in California counties with more than 25% of drinking water from  
 599 groundwater, 2011-2017.

## Supplemental Figures and Tables

446 Table S1. List of covariates used in the analysis.

| Data Source                                                                                                                       | Variable                                                                                     |
|-----------------------------------------------------------------------------------------------------------------------------------|----------------------------------------------------------------------------------------------|
| <b>5-Year American Community Survey</b><br><br>US Census Bureau data accessed via 'tidycensus' R Package Downloaded for year 2015 | Age, Median                                                                                  |
|                                                                                                                                   | Age, Over 65 (%)                                                                             |
|                                                                                                                                   | Age, Over 85 (%)                                                                             |
|                                                                                                                                   | Employed in Agriculture, Forestry, Fishing, Hunting, and Mining (%)                          |
|                                                                                                                                   | Employed in Arts, Entertainment, Recreation, Accommodation, & Food Services (%)              |
|                                                                                                                                   | Employed in Construction (%)                                                                 |
|                                                                                                                                   | Employed in Educational Services, Health Care, and Social Assistance (%)                     |
|                                                                                                                                   | Employed in Finance, Insurance, Real Estate, Rental, and Leasing (%)                         |
|                                                                                                                                   | Employed in Information (%)                                                                  |
|                                                                                                                                   | Employed in Manufacturing (%)                                                                |
|                                                                                                                                   | Employed in Other Services, except Public Administration (%)                                 |
|                                                                                                                                   | Employed in Professional, Scientific, Management, Administrative, & Waste Mgmt. Services (%) |
|                                                                                                                                   | Employed in Public Administration (%)                                                        |
|                                                                                                                                   | Employed in Retail Trade (%)                                                                 |
|                                                                                                                                   | Employed in Transportation, Warehousing, and Utilities (%)                                   |
|                                                                                                                                   | Employed in Wholesale Trade (%)                                                              |
|                                                                                                                                   | Foreign Born (%)                                                                             |
|                                                                                                                                   | GINI Index of Income Inequality                                                              |
|                                                                                                                                   | Health Insurance, None (%)                                                                   |
|                                                                                                                                   | Health Insurance, Private (%)                                                                |
|                                                                                                                                   | Health Insurance, Public (%)                                                                 |
|                                                                                                                                   | Health Insurance, Public, Medicaid (%)                                                       |
|                                                                                                                                   | Health Insurance, Public, Medicare (%)                                                       |
|                                                                                                                                   | Health Insurance, Public, VA (%)                                                             |
|                                                                                                                                   | Hispanic or Latino (%)                                                                       |
|                                                                                                                                   | Households Receiving Food Stamps/SNAP (%)                                                    |
|                                                                                                                                   | Median Age of Home                                                                           |
|                                                                                                                                   | Median Annual Income (USD)                                                                   |
|                                                                                                                                   | Median Home Value (USD)                                                                      |
|                                                                                                                                   | Median Monthly Rent (USD)                                                                    |

|                                                                                                                      |                                                      |
|----------------------------------------------------------------------------------------------------------------------|------------------------------------------------------|
|                                                                                                                      | Population Living in Owner Occupied Housing (%)      |
|                                                                                                                      | Population Living in Renter Occupied Housing (%)     |
|                                                                                                                      | Population Living with a Disability (%)              |
|                                                                                                                      | Population with Bachelor's Degree or Higher (%)      |
|                                                                                                                      | Race, American Indian and Alaska Native (%)          |
|                                                                                                                      | Race, Asian (%)                                      |
|                                                                                                                      | Race, Black or African American (%)                  |
|                                                                                                                      | Race, Native Hawaiian and Other Pacific Islander (%) |
|                                                                                                                      | Race, Some Other Race (%)                            |
|                                                                                                                      | Race, Two or More Races (%)                          |
|                                                                                                                      | Race, White (%)                                      |
|                                                                                                                      | Sex, Female (%)                                      |
|                                                                                                                      | Sex, Male (%)                                        |
|                                                                                                                      | Total Population                                     |
|                                                                                                                      | Unemployment Rate (%)                                |
|                                                                                                                      | Veteran (%)                                          |
| <b>CalEnviroScreen, v4.0</b>                                                                                         | Asthma                                               |
| California Office of Environmental Health Hazard Assessment<br>Report published Oct. 2021, data downloaded Jun. 2022 | Cardiovascular.Disease                               |
|                                                                                                                      | CES.4.0.Score                                        |
|                                                                                                                      | Cleanup.Sites                                        |
|                                                                                                                      | Diesel.PM                                            |
|                                                                                                                      | Drinking.Water                                       |
|                                                                                                                      | Education                                            |
|                                                                                                                      | Groundwater.Threats                                  |
|                                                                                                                      | Haz..Waste                                           |
|                                                                                                                      | Housing.Burden                                       |
|                                                                                                                      | Imp..Water.Bodies                                    |
|                                                                                                                      | Lead                                                 |
|                                                                                                                      | Linguistic.Isolation                                 |
|                                                                                                                      | Low.Birth.Weight                                     |
|                                                                                                                      | Ozone                                                |
|                                                                                                                      | Pesticides                                           |
|                                                                                                                      | PM2.5                                                |
|                                                                                                                      | Pollution.Burden                                     |
|                                                                                                                      | Pollution.Burden.Score                               |
|                                                                                                                      | Pop..Char.                                           |



|                                                                                                                                                        |                                            |
|--------------------------------------------------------------------------------------------------------------------------------------------------------|--------------------------------------------|
|                                                                                                                                                        | Pop..Char..Score                           |
|                                                                                                                                                        | Poverty                                    |
|                                                                                                                                                        | Solid.Waste                                |
|                                                                                                                                                        | Tox..Release                               |
|                                                                                                                                                        | Traffic                                    |
|                                                                                                                                                        | Unemployment                               |
| <b>Elevation</b><br>US Geologic Survey data accessed via 'elevatr' R package                                                                           | Elevation at well site (m above sea level) |
| <b>GeoMAC Wildfire Database</b><br>National Interagency Fire Center (NIFC)<br>Downloaded Jun. 2022 for years 2008-2017                                 | Area burned by wildfire (%)                |
|                                                                                                                                                        | Area burned by wildfire (m <sup>2</sup> )  |
| <b>NLCD Land Cover Change Index, 2001-2019</b><br>Multi-resolution Land Cover Consortium (MRLC)'s National Land Cover Database<br>Downloaded Jul. 2022 | Barren Change (%)                          |
|                                                                                                                                                        | Cultivated Crop Change (%)                 |
|                                                                                                                                                        | Forest Change (%)                          |
|                                                                                                                                                        | Grass and Shrub Change (%)                 |
|                                                                                                                                                        | Hay and Pasture Change (%)                 |
|                                                                                                                                                        | Herbaceous Wetland Change (%)              |
|                                                                                                                                                        | No Change (%)                              |
|                                                                                                                                                        | Urban Change (%)                           |
|                                                                                                                                                        | Water Change (%)                           |
|                                                                                                                                                        | Within Agricultural Class Change (%)       |
|                                                                                                                                                        | Within Wetland Class Change (%)            |
|                                                                                                                                                        | Woody Wetland Change (%)                   |
| <b>NLCD 2013 Developed Imperviousness</b><br>MRLC's National Land Cover Database<br>Downloaded Jul. 2022                                               | Urban Impervious Cover (%)                 |
| <b>NLCD 2013 Land Cover</b><br>Multi-resolution Land Cover Consortium (MRLC)'s National Land Cover Database<br>Downloaded for year 2016                | Barren Land (%)                            |
|                                                                                                                                                        | Cultivated Crops (%)                       |
|                                                                                                                                                        | Deciduous Forest (%)                       |
|                                                                                                                                                        | Developed, High Intensity (%)              |
|                                                                                                                                                        | Developed, Low Intensity (%)               |
|                                                                                                                                                        | Developed, Medium Intensity (%)            |
|                                                                                                                                                        | Developed, Open Space (%)                  |

|                                                                                                                      |                                                            |
|----------------------------------------------------------------------------------------------------------------------|------------------------------------------------------------|
|                                                                                                                      | Emergent Herbaceous Wetlands (%)                           |
|                                                                                                                      | Evergreen Forest (%)                                       |
|                                                                                                                      | Grassland and Herbaceous (%)                               |
|                                                                                                                      | Mixed Forest (%)                                           |
|                                                                                                                      | Open Water (%)                                             |
|                                                                                                                      | Pasture and Hay (%)                                        |
|                                                                                                                      | Perennial Ice and Snow (%)                                 |
|                                                                                                                      | Shrub and Scrub (%)                                        |
|                                                                                                                      | Woody Wetlands (%)                                         |
| <b>PFAS Analytics Tools, Industry Sectors</b><br><br>US Environmental Protection Agency<br>Data downloaded Aug. 2022 | Airports                                                   |
|                                                                                                                      | Airports (Part 139)                                        |
|                                                                                                                      | Cement Manufacturing                                       |
|                                                                                                                      | Chemical Manufacturing                                     |
|                                                                                                                      | Cleaning Product Manufacturing                             |
|                                                                                                                      | Consumer Products                                          |
|                                                                                                                      | Electronics Industry                                       |
|                                                                                                                      | Fire Protection                                            |
|                                                                                                                      | Fire Training                                              |
|                                                                                                                      | Furniture and Carpet                                       |
|                                                                                                                      | Glass Products                                             |
|                                                                                                                      | Industrial Gas                                             |
|                                                                                                                      | Metal Coating                                              |
|                                                                                                                      | Metal Machinery Manufacturing                              |
|                                                                                                                      | Mining and Refining                                        |
|                                                                                                                      | National Defense                                           |
|                                                                                                                      | Oil and Gas                                                |
|                                                                                                                      | Paints and Coatings                                        |
|                                                                                                                      | Paper Mills and Products                                   |
|                                                                                                                      | Petroleum                                                  |
| Plastics and Resins                                                                                                  |                                                            |
| Printing                                                                                                             |                                                            |
| Textiles and Leather                                                                                                 |                                                            |
| Waste Management                                                                                                     |                                                            |
| <b>POLARIS Soil Database</b><br><br>USGS data accessed via 'XPolaris' R package                                      | Saturated soil hydraulic conductivity ( $\log_{10}$ cm/hr) |
|                                                                                                                      | Soil bulk density ( $\text{g}/\text{c}^3$ )                |
|                                                                                                                      | Soil clay content (%)                                      |

|  |                                               |
|--|-----------------------------------------------|
|  | Soil organic matter content ( $\log_{10}\%$ ) |
|  | Soil pH                                       |
|  | Soil sand content (%)                         |
|  | Soil silt content (%)                         |

447

448 Table S2. Number of PFAS Sources by 23 industrial sectors: California.

| Industry Sector                | All of California | Study Area |
|--------------------------------|-------------------|------------|
| Waste management               | 2,711             | 1,183      |
| Oil and gas                    | 624               | 268        |
| Metal coating                  | 1,724             | 253        |
| Plastics and resins            | 954               | 233        |
| Chemical manufacturing         | 988               | 213        |
| Airports                       | 350               | 185        |
| Electronics industry           | 2,477             | 148        |
| Metal machinery manufacturing  | 716               | 138        |
| Petroleum                      | 470               | 122        |
| Printing                       | 829               | 107        |
| Paints and coatings            | 463               | 93         |
| Textiles and leather           | 506               | 83         |
| Mining and refining            | 112               | 58         |
| Cleaning product manufacturing | 316               | 54         |
| Furniture and carpet           | 212               | 48         |
| Paper mills and products       | 143               | 41         |
| National defense               | 175               | 39         |
| Consumer products              | 98                | 30         |
| Fire training                  | 61                | 30         |
| Cement manufacturing           | 55                | 28         |
| Industrial gas                 | 132               | 25         |
| Glass products                 | 133               | 17         |
| Airports (part 139)            | 31                | 15         |
| Total                          | 14,280            | 3,411      |

449

450 Note: EPA's ECHO Database [https://awsedap.epa.gov/public/extensions/PFAS\\_Tools/PFAS\\_Tools.html](https://awsedap.epa.gov/public/extensions/PFAS_Tools/PFAS_Tools.html)

451 Table S3. Ten ZCTA-level covariates found to be indicative of PFAS concentrations in groundwater.

|                                                         |
|---------------------------------------------------------|
| Covariates                                              |
| Population percent born outside of the US               |
| 2015 Population                                         |
| Population percent living in renter-occupied unit       |
| Population percent living in owner-occupied unit        |
| Population percent working in manufacturing             |
| Percent of area with new water or wetland landcover     |
| Population percent of "Other" race                      |
| Population percent of American Indian or Alaskan native |
| Percent of area with new urban landcover                |
| Average home age in years                               |

452

453 Table S4. Summary sampling results for 13 per- and polyfluoroalkyl substances (PFAS) species detected

| Chemical |                                                  | Mean and (Maximum) in ng/L | Number of Wells with PFAS Detected (Number Wells of Tested) | Number of Well Maximums <sup>a</sup> |
|----------|--------------------------------------------------|----------------------------|-------------------------------------------------------------|--------------------------------------|
| PFOS     | (perfluorooctanoic sulfonate)                    | 11.1 (510.0)               | 448 (1,646)                                                 | 269                                  |
| PFHXSA   | (perfluorohexanesulfonic acid)                   | 7.3 (690.0)                | 447 (1,618)                                                 | 154                                  |
| PFOA     | (perfluorooctanoic acid)                         | 6.6 (350.0)                | 407 (1,647)                                                 | 67                                   |
| PFHA     | (perfluorohexanoic acid)                         | 5.3 (510.0)                | 359 (1,628)                                                 | 53                                   |
| PFBSA    | (perfluorobutanesulfonic acid)                   | 3.2 (190.0)                | 331 (1,618)                                                 | 36                                   |
| ADONA    | (4,8-dioxa-3H-perfluorononanoic acid)            | <0.1 (16.0)                | 12 (1,257)                                                  | 8                                    |
| PFPA     | (perfluoropentanoic acid)                        | 0.1 (6.8)                  | 12 (247)                                                    | 5                                    |
| 6:2FTS   | (6:2 fluorotelomer sulfonic acid)                | <0.1 (5.9)                 | 3 (247)                                                     | 3                                    |
| PFHPA    | (perfluoroheptanoic acid)                        | 2.2 (170.0)                | 241 (1,636)                                                 | 2                                    |
| 8:2FTS   | (8:2 fluorotelomer sulfonic acid)                | <0.1 (2.6)                 | 1 (247)                                                     | 1                                    |
| NETFOSAA | (N-ethyl perfluorooctane sulfonamidoacetic acid) | <0.1 (6.0)                 | 4 (1,610)                                                   | 1                                    |
| PFNA     | (perfluorononanoic acid)                         | 0.5 (180.0)                | 103 (1,636)                                                 | 1                                    |
| PFNDCA   | (perfluorodecanoic acid)                         | 0.1 (17.0)                 | 42 (1,627)                                                  | 1                                    |

454 in groundwater wells within the study area: California, 2018-2021.

455 <sup>a</sup> Number of wells where this PFAS species had the highest concentration among all sampled species and  
 456 thus contributed to the exposure calculations at those wells.

457 Note: the sum of this column (n=601) exceeds the total number of wells in study area (n=589) because  
 458 12 wells had multiple PFAS compounds tied for the maximum concentration at those wells.

459 Note: Four additional PFAS species (PFBTA, PFPEs, PFUNDCA, NMEFOSAA) were detected in some wells,  
 460 but were never the maximum PFAS species sampled at any well within the study area. Testing occurred  
 461 for an additional 13 PFAS species (11CIPF3OUDS, 4:2FTS, 9CIPF3ONS, ETFOSA, HFPA-DA, MEFOSA,  
 462 PFDOA, PFDSA, PFHPSA, PFNS, PFOSA, PFTEDA, PFTRIDA), but all samples in study area were below the  
 463 minimum detection limit.

464 Table S4. Estimated percent difference (and 95% confidence intervals) in annual incidence of 17 chronic health conditions for a 10 ng/L  
 465 increment in distance weighted mean per- and polyfluoroalkyl substances (PFAS) groundwater concentration by epidemiologic model: 1,696,247  
 466 Medicare beneficiaries over age 65 living in California counties with more than 25% of drinking water from groundwater, 2011-2017.

|                                        | Epidemiologic model     |                         |                         |                                   |                         |                         |                                 |
|----------------------------------------|-------------------------|-------------------------|-------------------------|-----------------------------------|-------------------------|-------------------------|---------------------------------|
|                                        | Base Model              | + Testing PS            | + GW PS                 | + Regional Determinants of Health | + Smoking               | + PFAS Sources          | + PFAS Covariates "Final Model" |
| Model Degrees of Freedom               | 2                       | 5                       | 8                       | 11                                | 14                      | 37                      | 47                              |
| Hypertension                           | 0.92<br>(0.78, 1.07)    | 0.66<br>(0.51, 0.81)    | 0.78<br>(0.63, 0.93)    | 2.00<br>(1.86, 2.14)              | 1.12<br>(0.99, 1.26)    | 1.25<br>(1.11, 1.39)    | 1.15<br>(1.01, 1.30)            |
| Chronic Obstructive Pulmonary Disorder | 1.4<br>(1.2, 1.6)       | 1.32<br>(1.12, 1.53)    | 1.69<br>(1.48, 1.9)     | 1.87<br>(1.67, 2.07)              | 1.04<br>(0.85, 1.24)    | 1.32<br>(1.12, 1.53)    | 1.21<br>(1.01, 1.42)            |
| Chronic Kidney Disease                 | 0.66<br>(0.51, 0.82)    | 0.59<br>(0.44, 0.75)    | 0.77<br>(0.62, 0.93)    | 1.32<br>(1.17, 1.47)              | 0.73<br>(0.58, 0.88)    | 0.84<br>(0.68, 0.99)    | 0.83<br>(0.68, 0.99)            |
| Hyperlipidemia                         | 0.88<br>(0.73, 1.03)    | 0.54<br>(0.38, 0.69)    | 0.45<br>(0.29, 0.60)    | 1.44<br>(1.29, 1.58)              | 0.50<br>(0.36, 0.64)    | 0.65<br>(0.51, 0.80)    | 0.57<br>(0.43, 0.72)            |
| Congestive Heart Failure               | 0.51<br>(0.32, 0.7)     | 0.46<br>(0.26, 0.65)    | 0.73<br>(0.53, 0.93)    | 1.11<br>(0.92, 1.3)               | 0.5<br>(0.31, 0.69)     | 0.64<br>(0.44, 0.83)    | 0.51<br>(0.31, 0.7)             |
| Stroke                                 | 0.74<br>(0.48, 1)       | 0.64<br>(0.37, 0.91)    | 0.81<br>(0.54, 1.08)    | 1.04<br>(0.78, 1.3)               | 0.54<br>(0.28, 0.8)     | 0.65<br>(0.39, 0.91)    | 0.51<br>(0.25, 0.78)            |
| Atrial Fibrillation                    | 1.14<br>(0.9, 1.39)     | 1.12<br>(0.87, 1.37)    | 1.07<br>(0.82, 1.32)    | 1.02<br>(0.78, 1.26)              | 0.43<br>(0.2, 0.67)     | 0.51<br>(0.26, 0.75)    | 0.35<br>(0.1, 0.6)              |
| Diabetes                               | -1.03<br>(-1.22, -0.83) | -1.19<br>(-1.39, 0.99)  | -0.85<br>(-1.05, -0.65) | 0.43<br>(0.23, 0.62)              | 0.06<br>(-0.13, 0.25)   | 0.29<br>(0.10, 0.49)    | 0.34<br>(0.15, 0.54)            |
| Ischemic Heart Disease                 | -1.22<br>(-1.41, -1.03) | -1.38<br>(-1.58, -1.19) | -1.20<br>(-1.39, -1.00) | -0.44<br>(-0.63, -0.25)           | -0.89<br>(-1.07, -0.71) | -0.77<br>(-0.96, -0.59) | -0.79<br>(-0.98, -0.6)          |
| Cataract                               | 2.37<br>(2.21, 2.53)    | 2.19<br>(2.02, 2.35)    | 1.97<br>(1.80, 2.14)    | 2.52<br>(2.37, 2.68)              | 1.68<br>(1.53, 1.83)    | 1.73<br>(1.57, 1.88)    | 1.50<br>(1.35, 1.66)            |
| Glaucoma                               | 1.82<br>(1.58, 2.07)    | 1.55<br>(1.3, 1.81)     | 1.26<br>(1.01, 1.52)    | 1.45<br>(1.21, 1.7)               | 0.88<br>(0.63, 1.12)    | 0.76<br>(0.5, 1.01)     | 0.62<br>(0.37, 0.87)            |

|                                           |                         |                         |                         |                       |                        |                        |                         |
|-------------------------------------------|-------------------------|-------------------------|-------------------------|-----------------------|------------------------|------------------------|-------------------------|
| Anemia                                    | 0.46<br>(0.30, 0.62)    | 0.35<br>(0.19, 0.51)    | 0.4<br>(0.24, 0.56)     | 0.95<br>(0.79, 1.1)   | 0.3<br>(0.15, 0.45)    | 0.37<br>(0.22, 0.53)   | 0.33<br>(0.18, 0.49)    |
| Rheumatoid Arthritis<br>/ Osteoarthritis  | 1.29<br>(1.13, 1.45)    | 1.05<br>(0.89, 1.22)    | 0.93<br>(0.77, 1.10)    | 1.39<br>(1.23, 1.55)  | 0.77<br>(0.62, 0.93)   | 0.81<br>(0.65, 0.97)   | 0.72<br>(0.57, 0.88)    |
| Acquired Hypothyroidism                   | 0.94<br>(0.73, 1.14)    | 0.8<br>(0.59, 1.01)     | 0.61<br>(0.4, 0.83)     | 0.72<br>(0.52, 0.92)  | 0.28<br>(0.08, 0.48)   | 0.4<br>(0.2, 0.61)     | 0.5<br>(0.29, 0.7)      |
| Chronic Obstructive Pulmonary<br>Disorder | 1.4<br>(1.2, 1.6)       | 1.32<br>(1.12, 1.53)    | 1.69<br>(1.48, 1.9)     | 1.87<br>(1.67, 2.07)  | 1.04<br>(0.85, 1.24)   | 1.32<br>(1.12, 1.53)   | 1.21<br>(1.01, 1.42)    |
| Alzheimer's and Dementia                  | 0.47<br>(0.25, 0.68)    | 0.48<br>(0.25, 0.7)     | 0.6<br>(0.38, 0.83)     | 0.89<br>(0.68, 1.11)  | 0.48<br>(0.26, 0.69)   | 0.61<br>(0.39, 0.83)   | 0.46<br>(0.24, 0.69)    |
| Asthma                                    | -0.56<br>(-0.86, -0.26) | -0.72<br>(-1.02, -0.41) | -0.41<br>(-0.72, -0.11) | 0.16<br>(-0.14, 0.45) | -0.3<br>(-0.58, -0.01) | -0.16<br>(-0.46, 0.13) | -0.34<br>(-0.63, -0.04) |
| Benign Prostatic Hyperplasia              | 0.75<br>(0.5, 1)        | 0.52<br>(0.26, 0.77)    | 0.47<br>(0.21, 0.72)    | 0.92<br>(0.67, 1.17)  | 0.44<br>(0.2, 0.68)    | 0.46<br>(0.21, 0.71)   | 0.44<br>(0.19, 0.7)     |
| Depression                                | 0.43<br>(0.24, 0.62)    | 0.36<br>(0.16, 0.55)    | 0.34<br>(0.14, 0.54)    | 0.58<br>(0.39, 0.77)  | 0.15<br>(-0.04, 0.33)  | 0.20<br>(0.00, 0.39)   | 0.09<br>(-0.10, 0.28)   |
| Hip Fracture                              | 1.01<br>(0.59, 1.43)    | 1<br>(0.57, 1.43)       | 0.99<br>(0.56, 1.43)    | 0.78<br>(0.36, 1.19)  | 0.26<br>(-0.15, 0.67)  | 0.34<br>(-0.08, 0.77)  | 0.11<br>(-0.32, 0.54)   |

467



468 Figure S1. Directed Acyclic Graph (DAG) used for development of epidemiologic models.

469

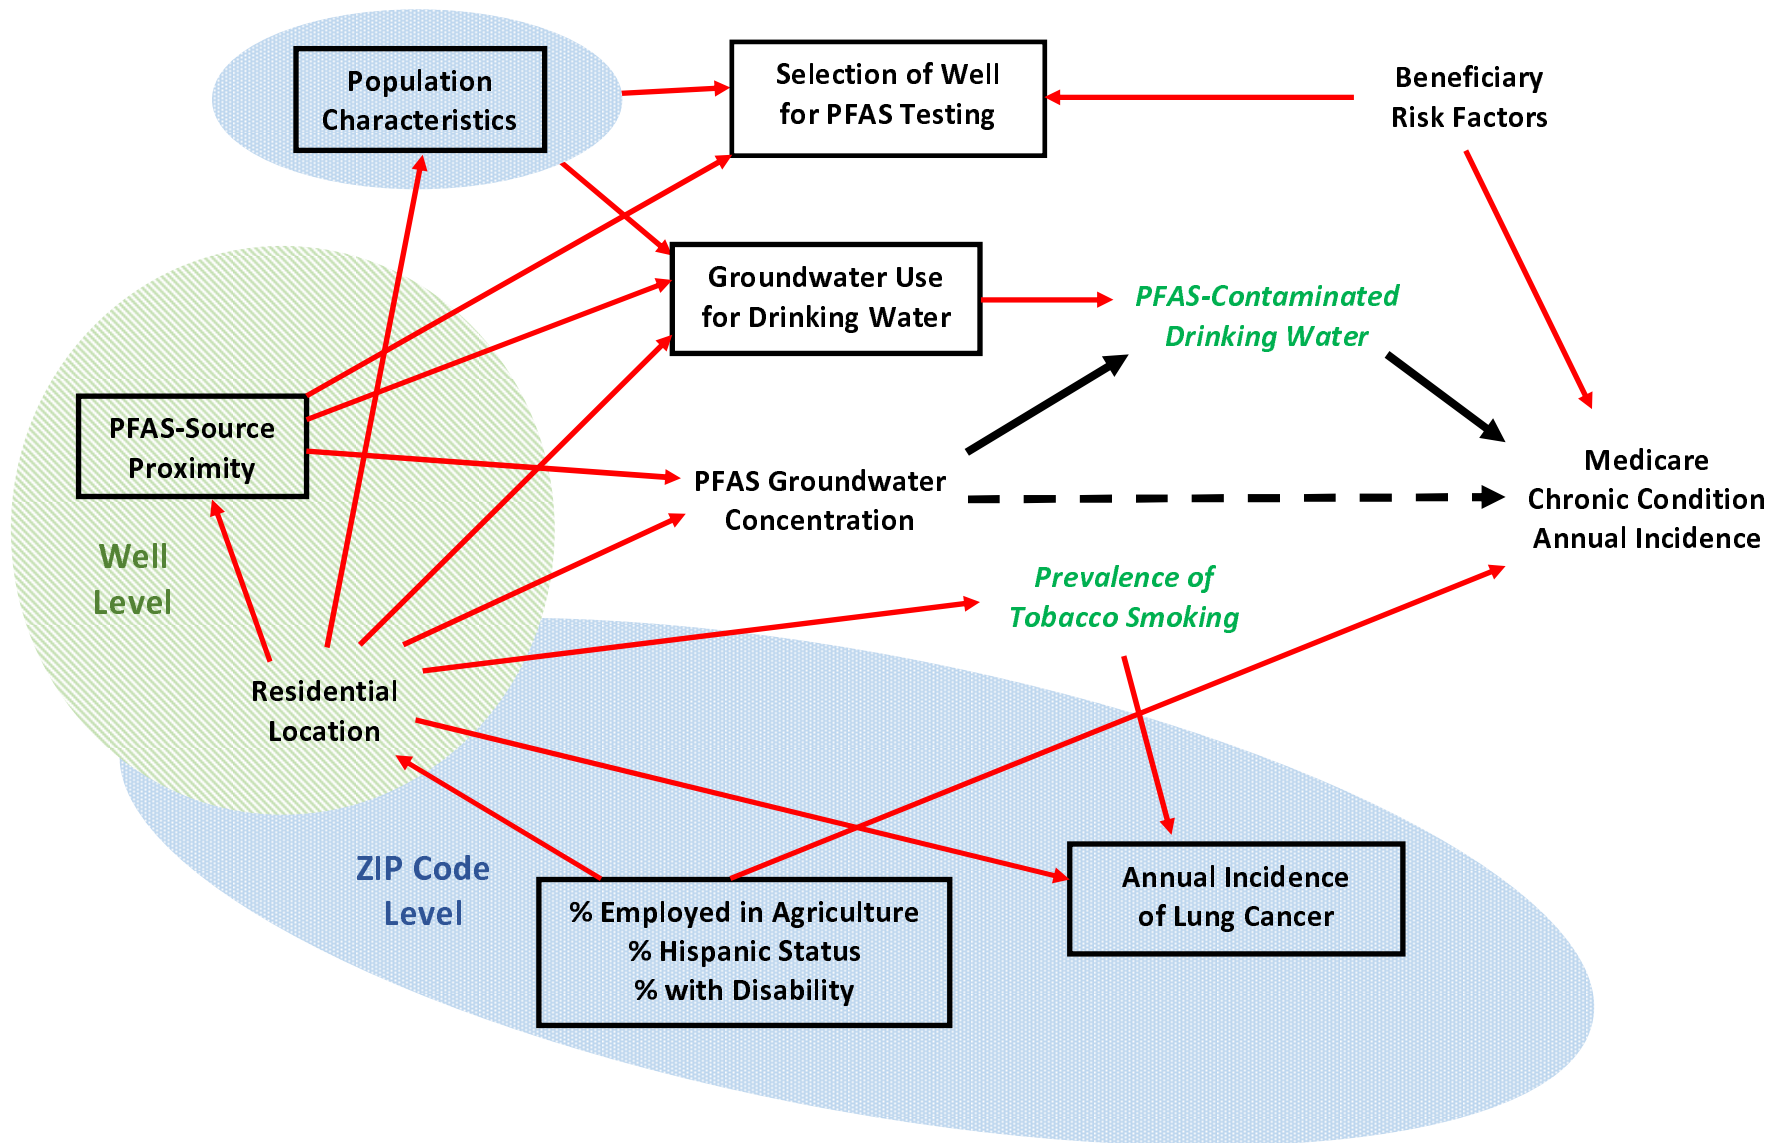

470 Figure S2. Distance-weighted mean of the well-specific maximum per- and polyfluoroalkyl substances (PFAS) concentrations (ng/L) versus 17  
471 chronic condition incidence rates (%) by study area ZCTAs (n=523): 1,696,247 Medicare beneficiaries over age 65 living in California counties  
472 with more than 25% of drinking water from groundwater, 2011-2017.

473

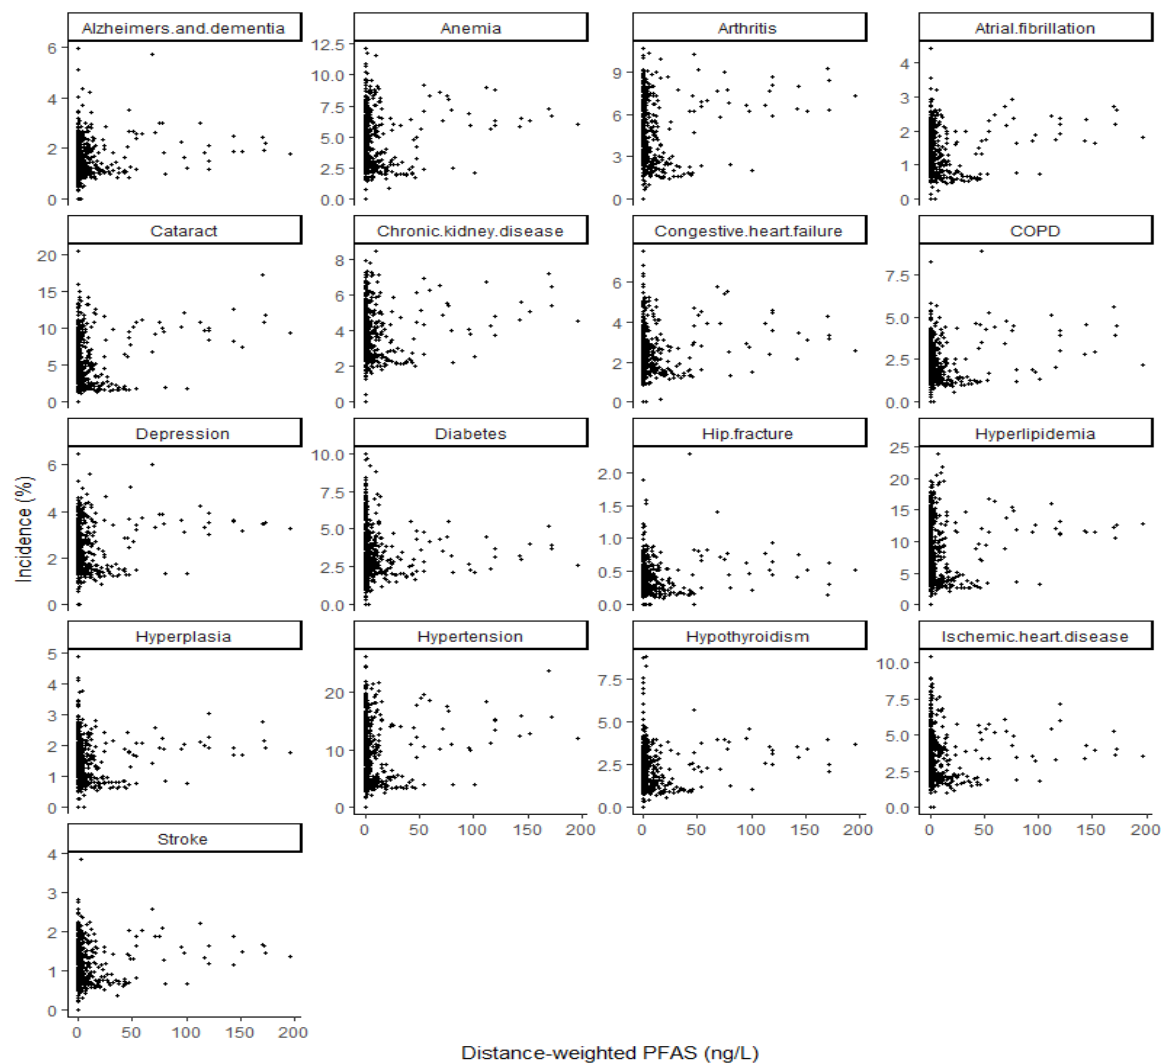

474 Figure S3. Sensitivity analysis results. Final model results for four chronic conditions split by different per- and polyfluoroalkyl substances (PFAS)  
 475 exposure metrics – distance-weighted average of well maximums, distance- and propensity-weighted average of well maximums, and the  
 476 unweighted average of well maximums across ZCTAs in study area without the ZCTA with a single largest PFAS value (n=522): 1,696,247  
 477 Medicare beneficiaries over age 65 living in California counties with more than 25% of drinking water from groundwater, 2011-2017.

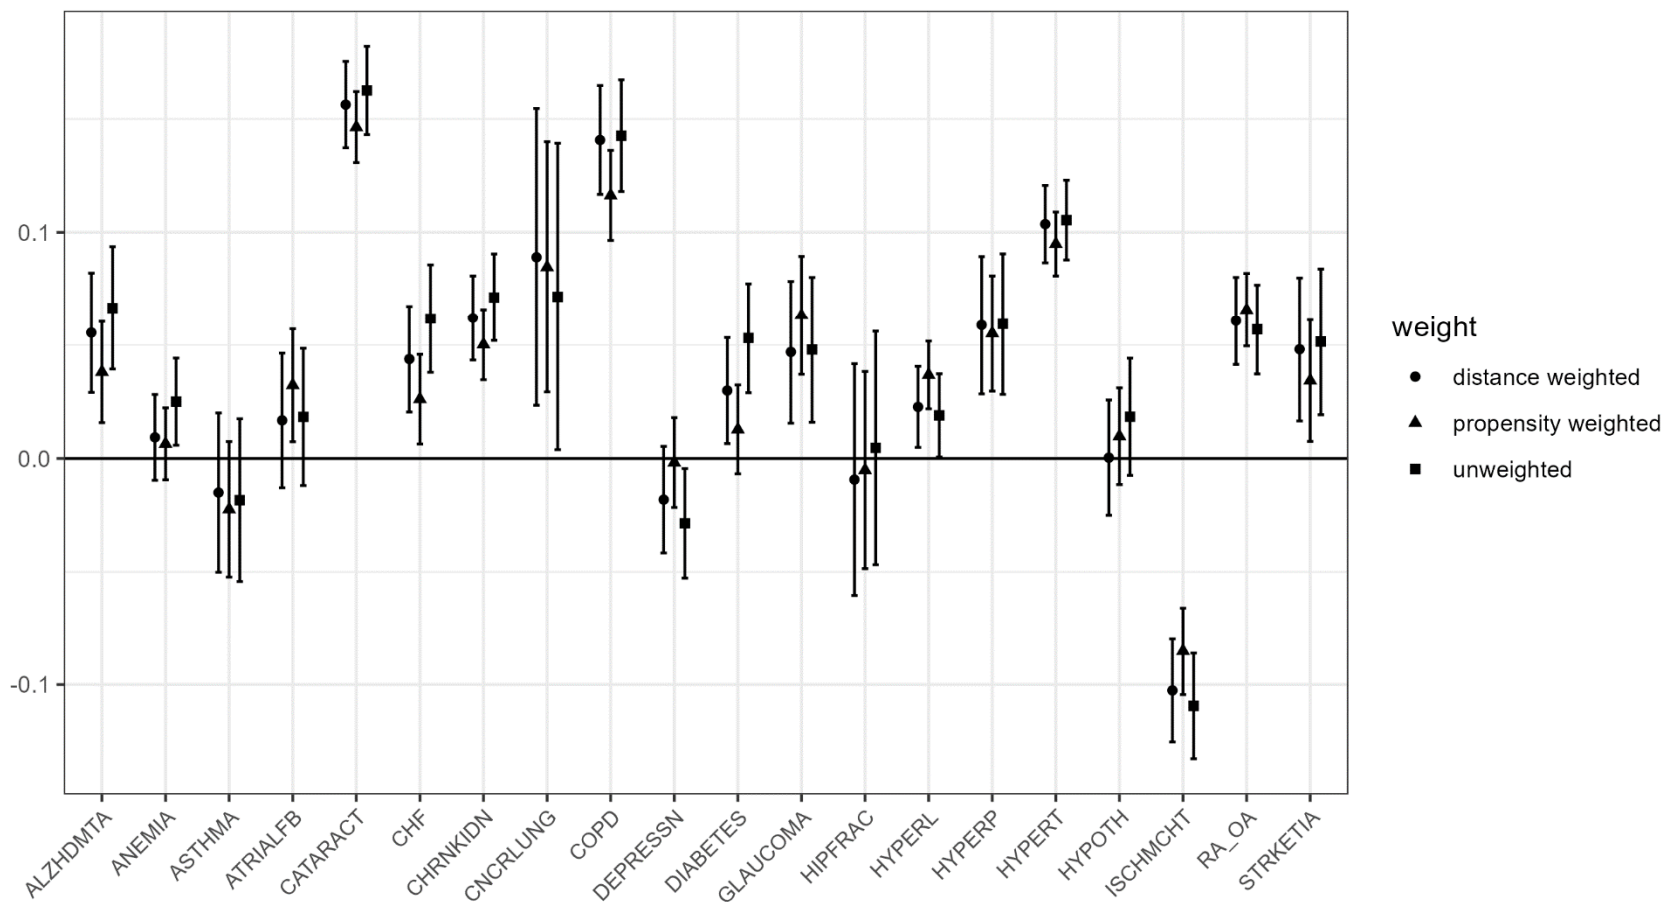

478  
 479
